# Supplementary material
Source: PubMed Central journal article supplement (PMC7611443)
Supplement: EMS123190-supplement-Supplementary_Information.pdf [file EMS123190-supplement-Supplementary_Information.pdf]

## Switching-on Prodrugs using Radiotherapy

Jin Geng,<sup>1,2,7\*</sup> Yichuan Zhang,<sup>1,2,7</sup> Quan Gao<sup>2</sup>, Kevin Neumann<sup>1</sup>, Hua Dong<sup>1</sup>, Hamish

Porter<sup>3</sup>, Mark Potter<sup>4</sup>, Hua Ren,<sup>5,6</sup> David Argyle<sup>3</sup>, Mark Bradley<sup>1\*</sup>

### Affiliations:

<sup>1</sup>EaStCHEM School of Chemistry, University of Edinburgh, Edinburgh EH9 3FJ, United Kingdom

<sup>2</sup>Shenzhen Institute of Advanced Technology, Chinese Academy of Sciences, Shenzhen 518059, China

<sup>3</sup>The Royal (Dick) School of Veterinary Studies and Roslin Institute, University of Edinburgh, Easter Bush, Edinburgh EH25 9RG, United Kingdom

<sup>4</sup>Department of Surgery, Western General Hospital, Edinburgh EH4 2XU, United Kingdom

<sup>5</sup>Department of Radiation Oncology, National Cancer Center/National Clinical Research Center for Cancer/Cancer Hospital, Chinese Academy of Medical Sciences and Peking Union Medical College, Beijing 100021, China

<sup>6</sup>Department of Radiation Oncology, National Cancer Center/National Clinical Research Center for Cancer/Cancer Hospital & Shen Zhen Hospital, Chinese Academy of Medical Sciences and Peking Union Medical College, Shenzhen 518116, China

<sup>7</sup>These authors contributed equally: Jin Geng, Yichuan Zhang

\*email: jin.geng@siat.ac.cn; mark.bradley@ed.ac.uk

### 1. General information

Anhydrous solvents were purchased from Sigma Aldrich. PeproTech. Imidazole-1-sulfonylazine hydrochloride was purchased from Fluorochem. Hoechst 33342 and Click-iT™ Edu Alexa Fluor™ 488 were purchased from ThermoFisher. Celltiter Glo® was purchased

from Promega.  $\mu$ -Dish and 8-well chambers were obtained from Ibidi. Corning® HTSTranswell® 96 well plates (8  $\mu$ m pore) was purchased from Sigma Aldrich. All other chemicals were purchased from Sigma Aldrich and used without further purification.

**X-ray source:** A linear accelerator (Clinac iX from Varian Medical Systems) generated X-rays of nominal energy 6MV (with a Bremsstrahlung distribution of 2 – 6 MeV) were used, with a dose rate of 600 cGy per minute with samples treated at a depth of 1015 mm from the tungsten target with a build-up of 15 mm of solid water. The linear accelerator used was a Varian Medical Systems VitalBeam medical linear accelerator.

$^1\text{H}$  and  $^{13}\text{C}$  NMR spectra were recorded on a Bruker AVA500 spectrometer (500 and 125 MHz, respectively) at 298 K in deuterated solvents. Chemical shifts for proton and carbon spectra are reported on the  $\delta$  scale in ppm. All coupling constants ( $J$  values) were measured in Hz. High Resolution MS analysis were performed on a Bruker microTOF focus II msass spectrometer. Reverse phase analytical HPLC (RP-HPLC) were performed using an Agilent 1100 ChemStation using ChemStation B.03.017 software, with a Kinetex 5u XB-C18 ( $50 \times 4 \times 60$  mm) column, with a flow rate of 1 mL/min using an evaporative light scattering detector (ELSD) (Polymer Lab PL-ELS 1000) with simultaneous detection at 220, 254, 260, 282 and 495 nm. Method A: Elution with 5% MeOH in water to 95% MeOH in water over 6 min and 95% MeOH in water for 4 min (both with 0.1% formic acid); Method B: Elution with 5% MeCN in water to 95% MeCN in water over 6 min and 95% MeCN in water for 4 min (both with 0.1% formic acid). All solvents used were HPLC grade. The fluorescence spectra were recorded using a FluoroMax-3 Jobin Yvon Div fluorimeter using DataMax v.2.20 software. Raw data were processed using Grapppad Prism (6.01), Origin (8.5.1) and Excel (15.25).

Prep-HPLC was performed with an Agilent Zorbax Eclipse® 5µm XDB-C18 column (250 × 10 mm, 5 µm), eluting with a gradient of H<sub>2</sub>O/formic acid (0.1%) to ACN/formic acid (0.1%) over 25 min, with a flow rate of 2 mL/min.

Flow cytometry analysis was carried out on a Becton Dickinson (BD) FACSDiVa 2.2 software using the FlowJo software for data analysis. The absorbance and luminescence of 96-well plates were read on a BioTek HT Synergy multimode reader using the Gen 5.2.06.10 software. HeLa cells were monitored using a 20× objective (Leica fluorescence microscope using AxioVision 4.8.2.0 SP2 software) under brightfield and 488 nm excitation. Confocal images were taken on a Leica confocal microscope using LAS-AF-Lite\_2.6.0 software for digital acquisition. Images were processed and analysed using ImageJ64 (1.51v).

### **Monitoring model reactions under X-ray irradiation**

Selected model compounds (see chemical structures in Table 1 and Fig. S1 below) were dissolved in DMSO to give stock solutions of 100 mM and diluted in PBS (20 mL) to give a final concentration of 10 µM. The solutions were degassed by bubbling Ar for 30 min, analysed by HPLC and irradiated by the X-ray source. The reaction mixtures after irradiation were analysed by HPLC.

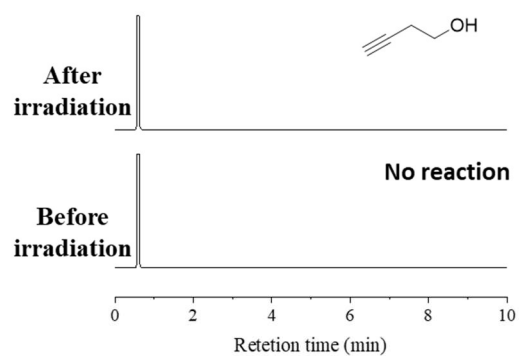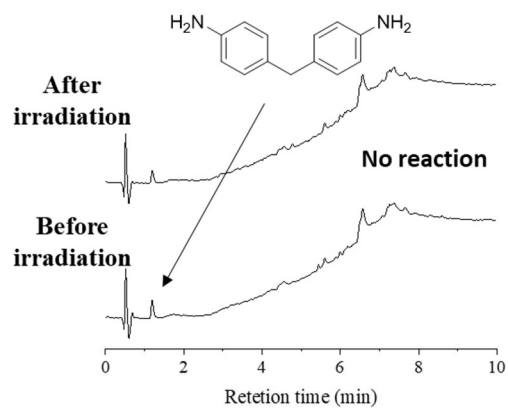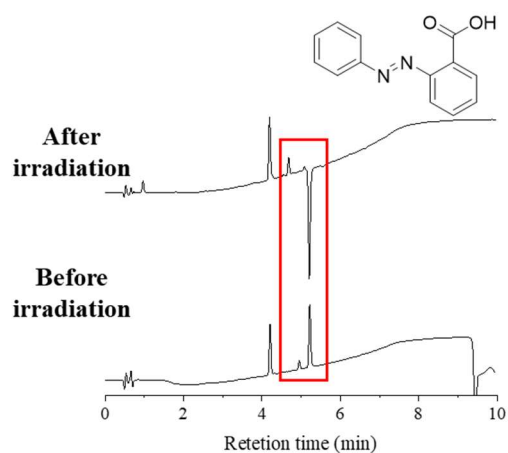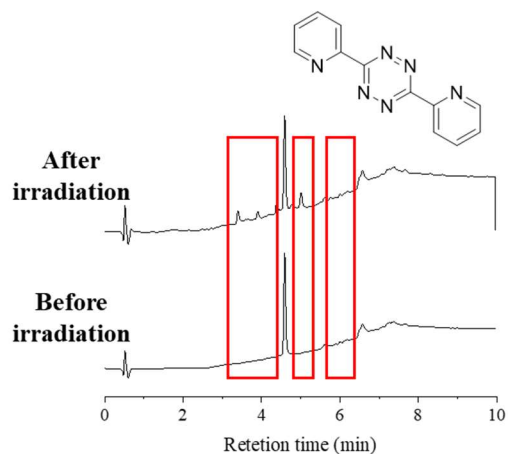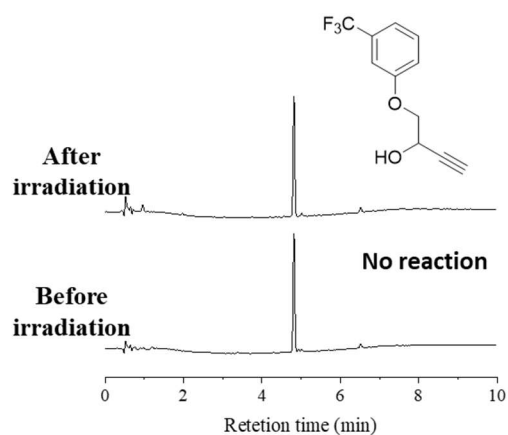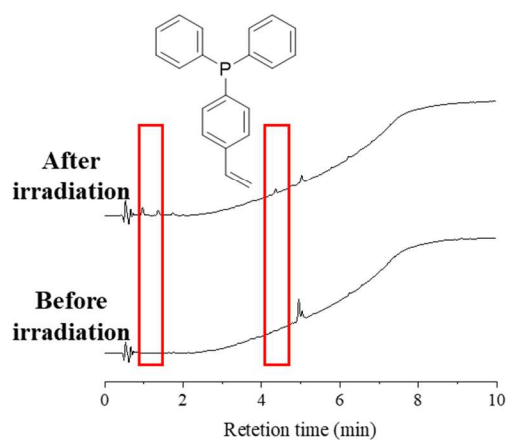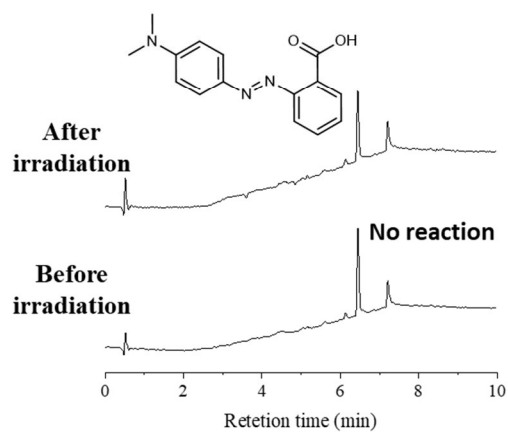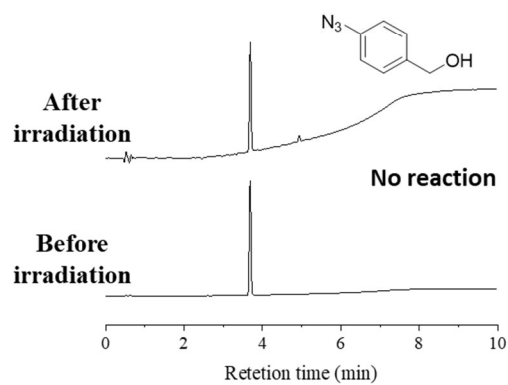

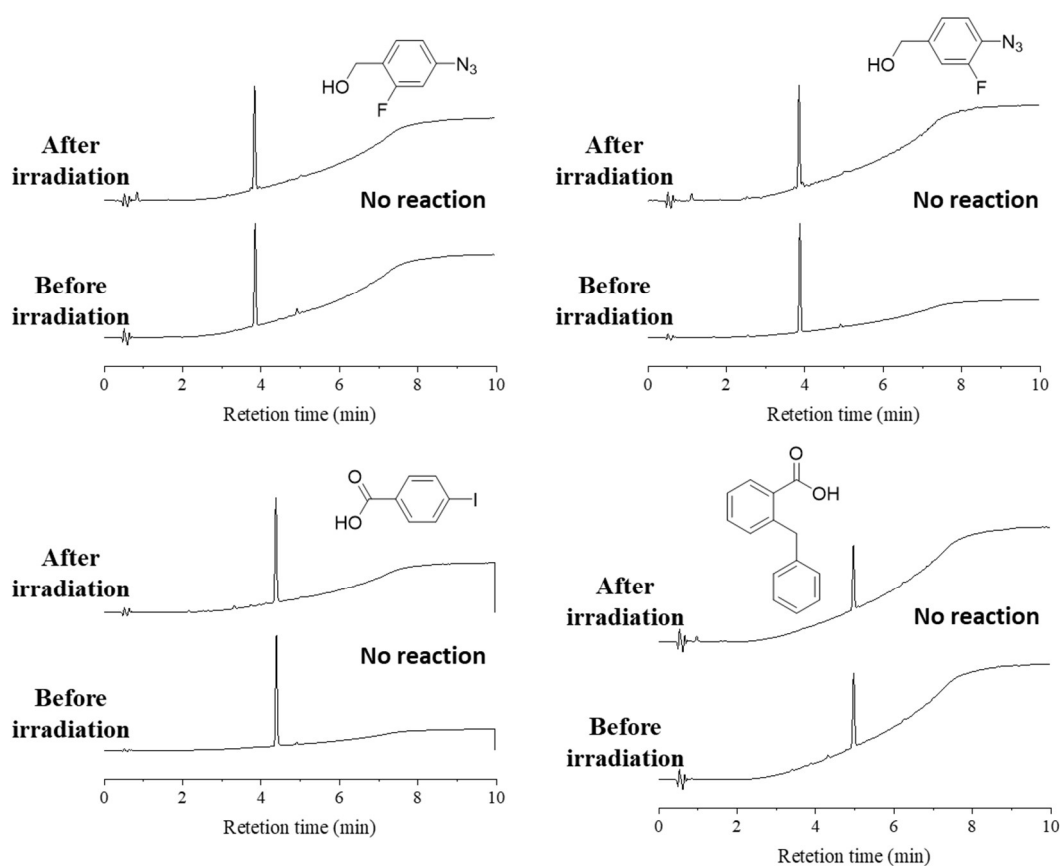

**Fig. S1.** HPLC traces of model reactions monitored (254 nm) before and after X-ray irradiation.

### Calibration of OH radical concentrations by X-ray irradiation

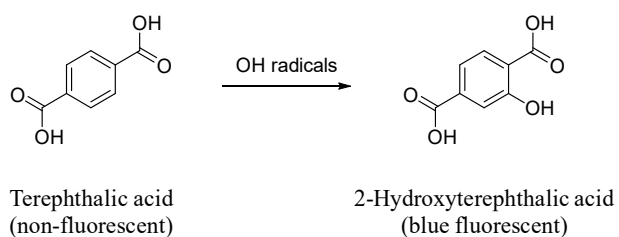

The hydroxy radical concentration was quantified using terephthalic acid as an indicator as reported in the literature.<sup>1</sup> Briefly, fluorescence intensities of 2-hydroxyterephthalic acid (0.5, 1, 5, 10, 20 and 30  $\mu\text{M}$ ) in PBS were recorded using a fluorescence spectrometer ( $\lambda_{\text{ex}} = 320$  nm) with the fluorescence intensities plotted versus terephthalic acid concentrations as a calibration curve. A stock solution of terephthalic acid (1 M in DMSO) was diluted in PBS (20

mL) to give a final concentration of 100  $\mu\text{M}$ . The solution was degassed by bubbling Ar for 30 min before X-Ray irradiation (6, 12, 24, 36, 48 and 60 Gy).

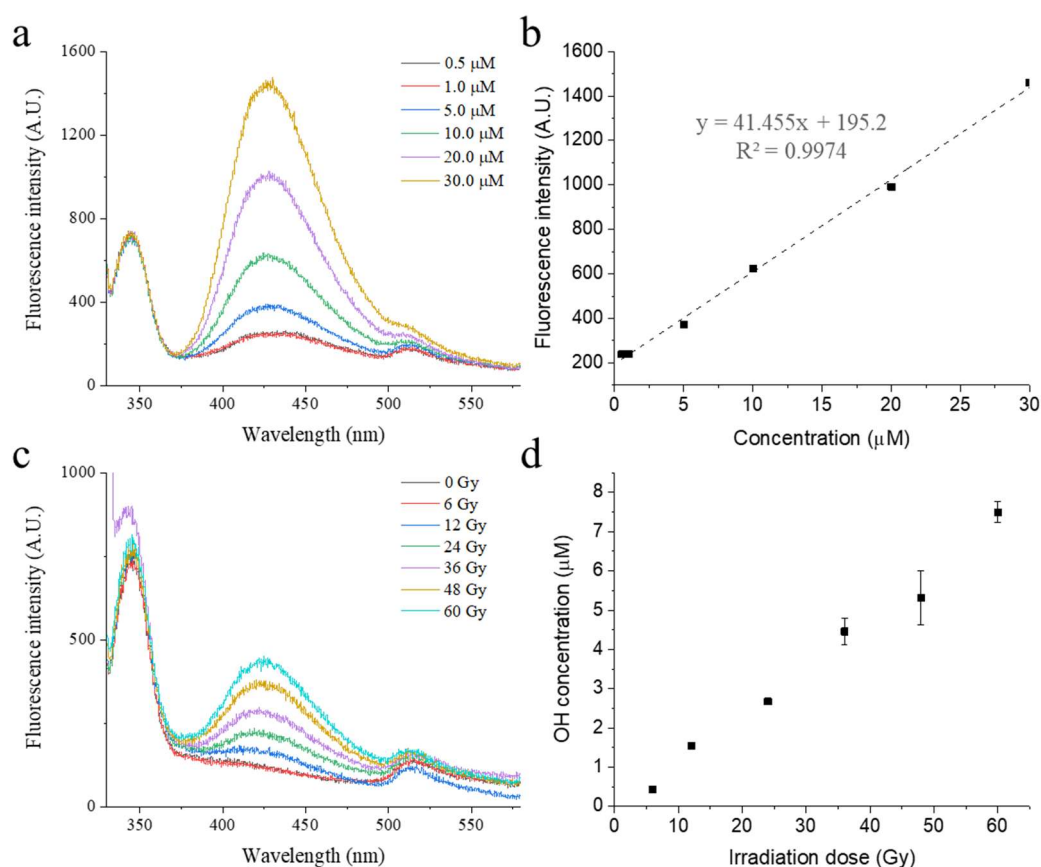

**Fig. S2.** (a) Fluorescence spectra of 2-hydroxyterephthalic acid in PBS (pH = 7.4) ( $\lambda_{\text{ex}} = 320$  nm) at different concentrations and (b) the calibration curve of fluorescence intensities at 426 nm versus the concentration of 2-hydroxyterephthalic acid. The data are presented as mean  $\pm$  SD ( $n = 3$ ). (c) Fluorescence spectra of terephthalic acid (100  $\mu\text{M}$  in PBS, pH = 7.4) irradiated at different doses and (d) the fluorescence intensities at 426 nm plotted versus irradiation doses. The data are presented as mean  $\pm$  SD ( $n = 3$ ). The experiments were repeated, independently, 3 times with similar results observed.

### Synthesis of compound **3**

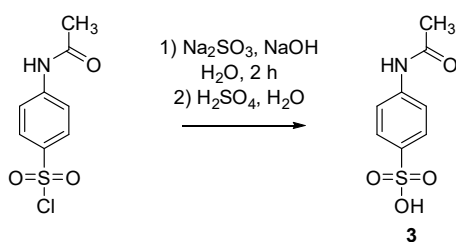

Compound **3** was synthesised following a reported procedure giving a white solid in a 93% yield (4.8 g).<sup>2</sup>

$^1\text{H}$  NMR (500 MHz,  $d\text{-CDCl}_3$ )  $\delta$  (ppm) = 10.22 (s, 1H), 7.75 (d,  $J$  = 8.7 Hz, 2H), 7.58 (d,  $J$  = 8.7 Hz, 2H), 2.07 (s, 3H);  $^{13}\text{C}$  NMR (125 MHz,  $d\text{-CDCl}_3$ )  $\delta$  (ppm) = 169.38, 143.40, 141.52, 125.84, 119.93, 24.52; HRMS (EI) for  $\text{C}_8\text{H}_9\text{NO}_4\text{S}$ : *calcd.*: 215.0246; *found*: 215.0239.

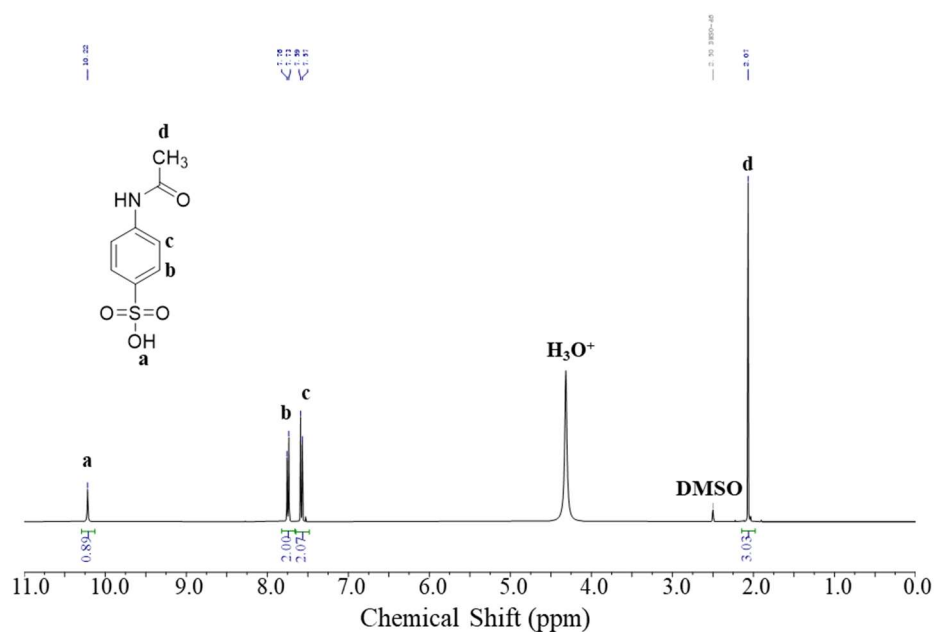

**Fig. S3.**  $^1\text{H}$  NMR spectrum of compound **3** in  $d_6\text{-DMSO}$ .

### Reaction of model compound **1** under X-ray irradiation

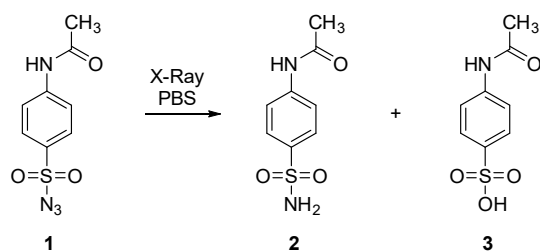

A stock solution of compound **1** (100 mM in DMSO) was diluted in PBS (20 mL) to give a final concentration of 20  $\mu$ M. The solution was degassed by bubbling with Ar for 30 min before X-Ray irradiation. The reaction mixture was analysed by FTIR and following prep-HPLC, the isolated products were analysed by HRMS. The products co-eluted by HPLC [compared with synthesised compound **3** and commercially available compound **2** (CAS 121-61-9)]. (Compound **3** was not isolatable due to the limited quantity obtained).

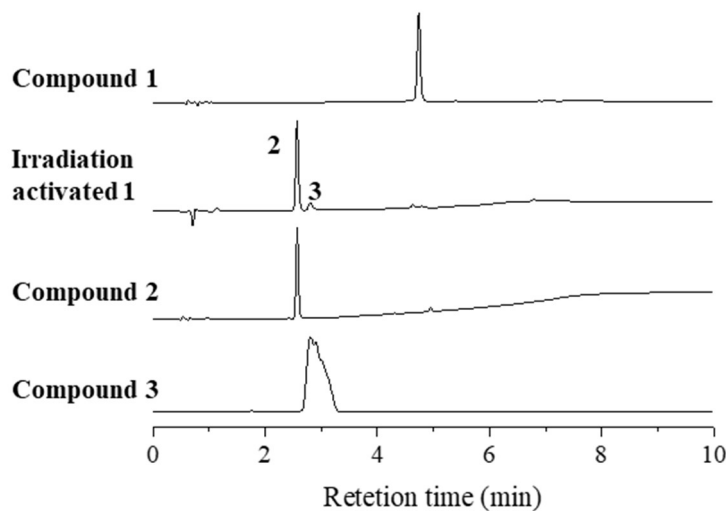

**Fig. S4.** HPLC traces of model compound **1**, irradiation activated **1**, compound **2** and compound **3**.

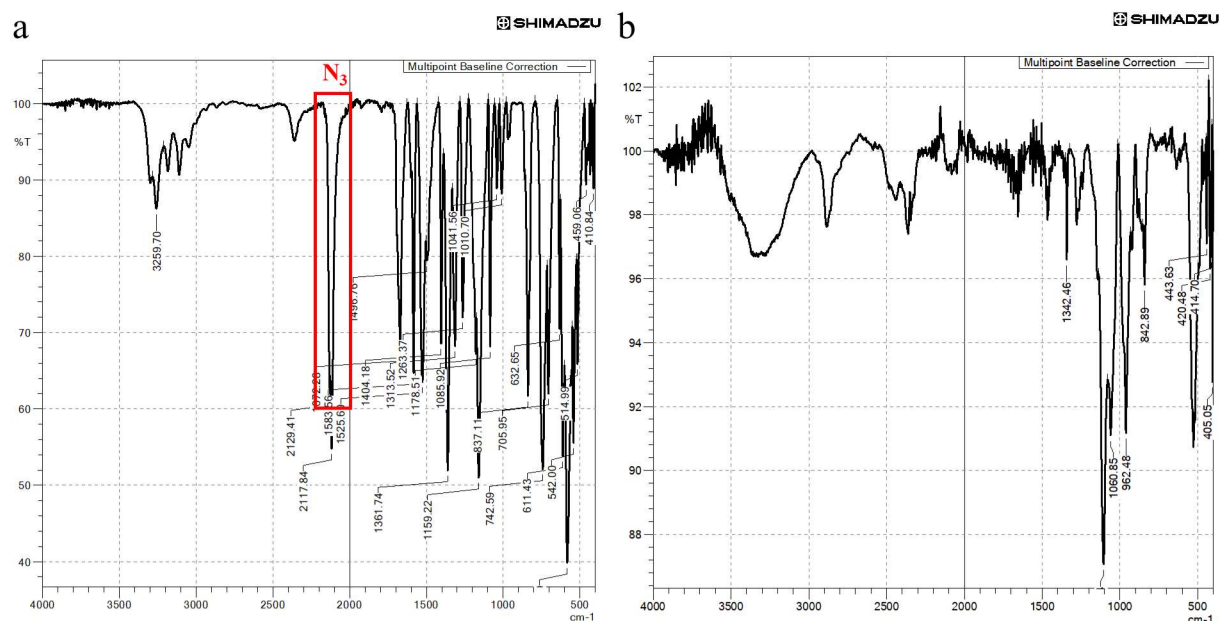

**Fig. S5.** FTIR spectra of (a) compound **1** and (b) irradiated **1** (60 Gy). The absence of the identical azide signal (2117.8 cm⁻¹) indicated the consumption of **1**.

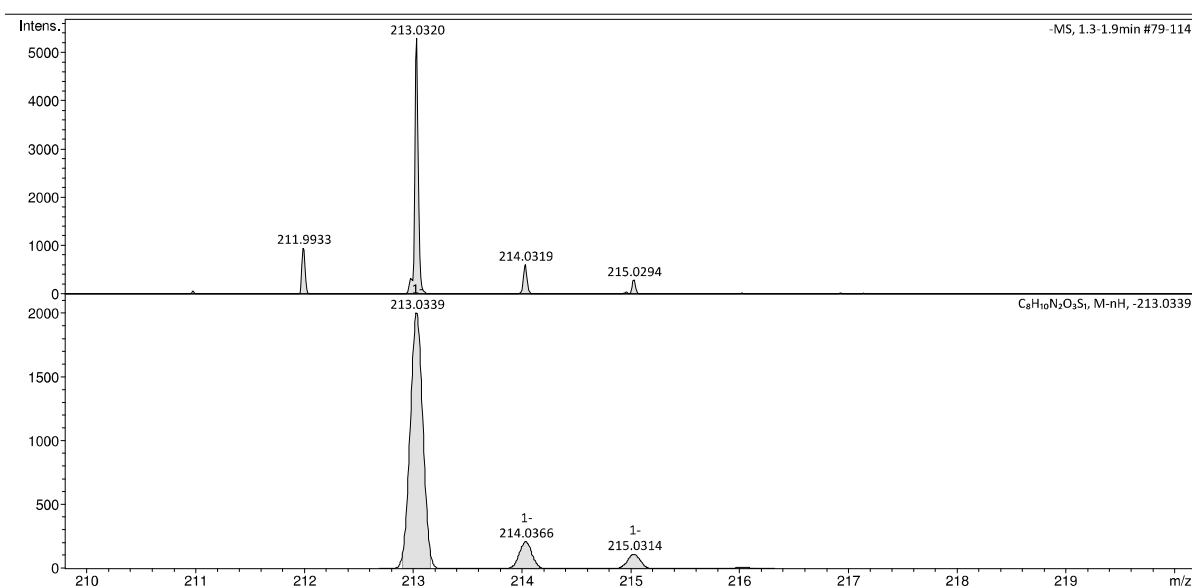

**Fig. S6.** HRMS spectrum of **2**, isolated from an irradiated mixture of **1** (60 Gy) by prep-HPLC. (ESI) for C<sub>8</sub>H<sub>10</sub>N<sub>2</sub>O<sub>3</sub>S [M-H]<sup>+</sup>: *calcd.*: 213.0339; *found*: 213.0320.

## Synthesis of compound 4

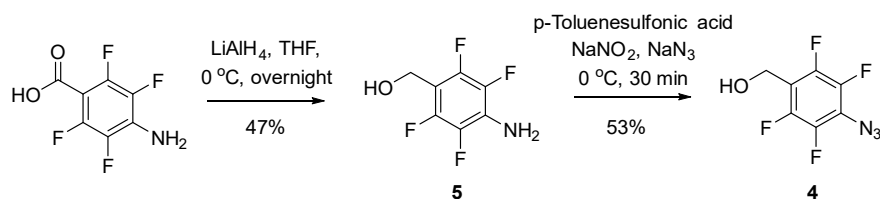

Compound **5** and **4** was synthesised following reported procedure.<sup>3</sup>

Compound **5** was synthesised giving a brown solid in a 55% yield (950 mg).

Compound **5**,  $^1\text{H}$  NMR (500 MHz,  $\text{d-CDCl}_3$ )  $\delta$  (ppm) = 4.75 (d,  $J = 6.4$ , 2H), 4.05 (s, 2H), 1.81 (t,  $J = 6.3$  Hz, 1H);  $^{13}\text{C}$  NMR (125 MHz,  $\text{d-CDCl}_3$ )  $\delta$  (ppm) = 144.34 (m,  $J_{\text{C-F}}$ ), 136.05 (m,  $J_{\text{C-F}}$ ), 126.43 (m,  $J_{\text{C-F}}$ ), 105.73, 60.41; HRMS (ESI) for  $\text{C}_7\text{H}_5\text{F}_4\text{NO}$   $[\text{M}+\text{H}]^+$ : *calcd.*: 194.0203; found: 194.0234.

Compound **4** was synthesised giving a white solid in a 92% yield (99 mg).

Compound **4**,  $^1\text{H}$  NMR (600 MHz,  $\text{d-CDCl}_3$ )  $\delta$  (ppm) = 4.82 (d,  $J = 6.6$  Hz, 2H), 1.92 (t,  $J = 6.6$  Hz, 1H);  $^{13}\text{C}$  NMR (150 MHz,  $\text{d-CDCl}_3$ )  $\delta$  144.43 (m,  $J_{\text{C-F}}$ ), 140.72 (m,  $J_{\text{C-F}}$ ), 120.02 (m,  $J_{\text{C-F}}$ ), 114.07, 52.69.

Data in agreement with the literature.<sup>3</sup>

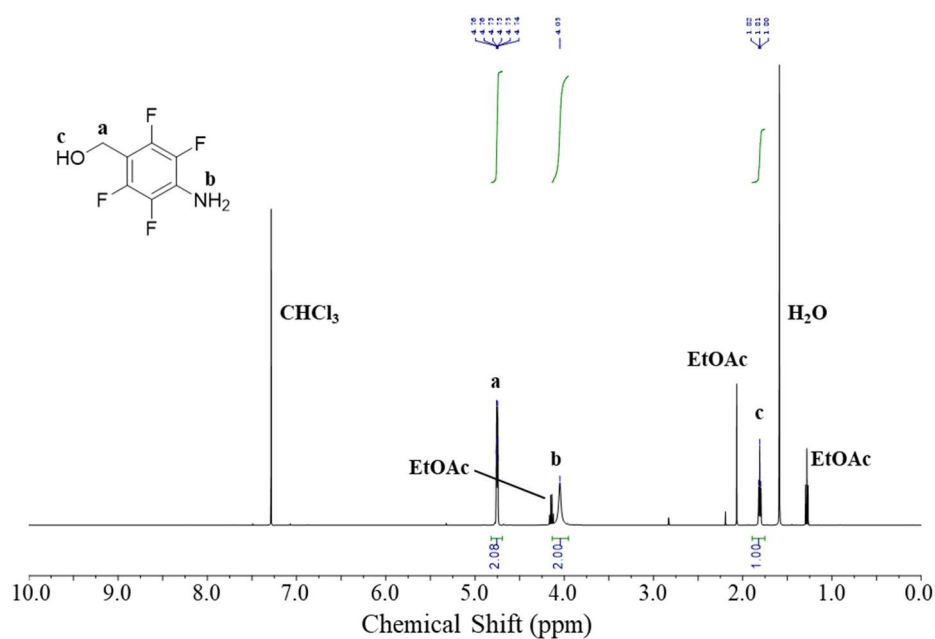

**Fig. S7.**  $^1\text{H}$  NMR spectrum of model compound **5** in  $\text{CDCl}_3$ .

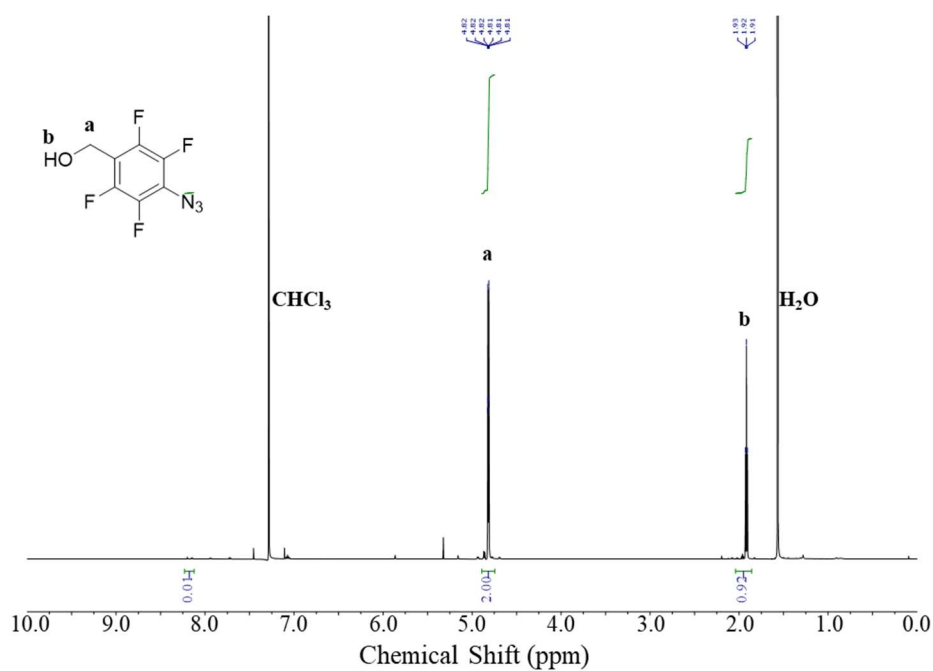

**Fig. S8.**  $^1\text{H}$  NMR spectrum of model compound **4** in CDCl<sub>3</sub>.

#### Reaction of model compound **4** under X-ray irradiation

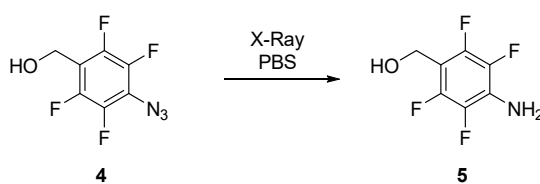

A stock solution of model compound **4** (100 mM in DMSO) was diluted in PBS (20 mL) to give a final concentration of 10  $\mu\text{M}$ . The solution was degassed by bubbling Ar for 30 min before X-Ray irradiation. The isolated product was identified by  $^1\text{H}$ NMR and HRMS.

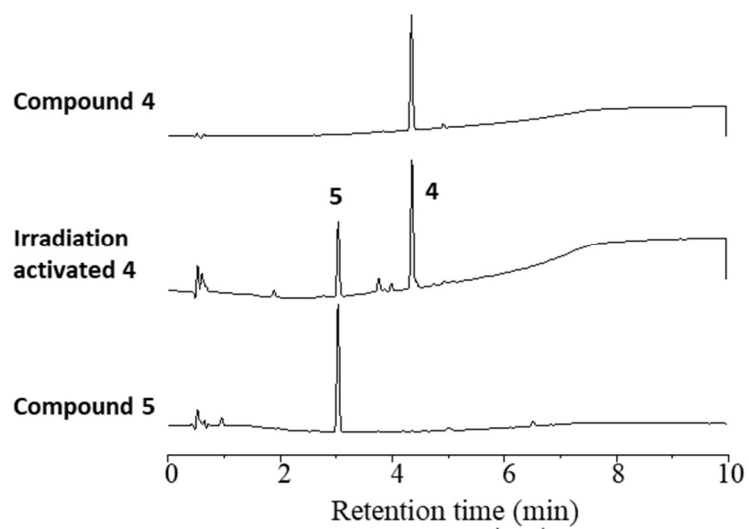

**Fig. S9.** HPLC traces of model compound **4**, irradiation activated **4** and compound **5** (synthesised as described above).

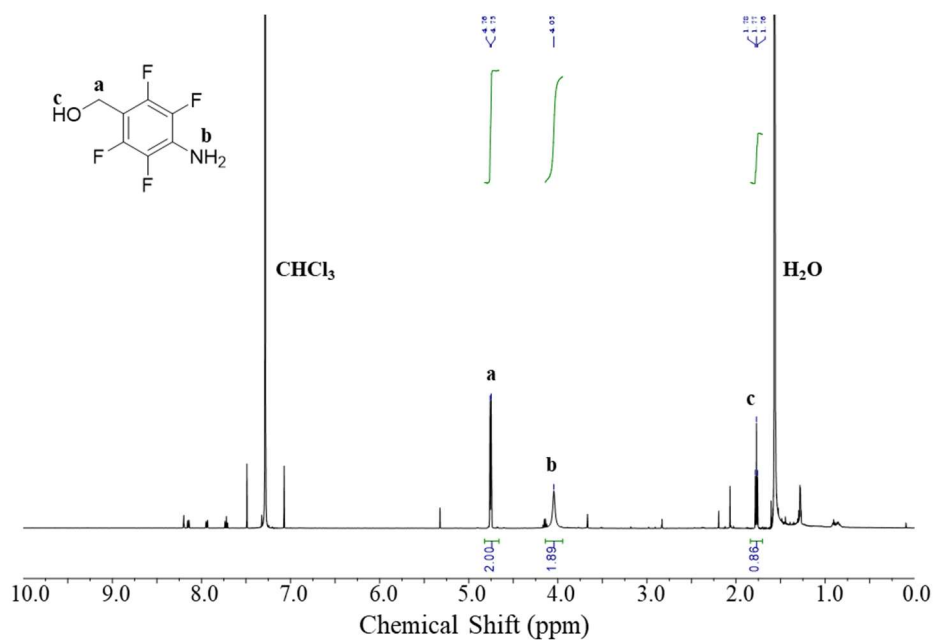

**Fig. S10.** <sup>1</sup>H NMR spectrum of **5** (in CDCl<sub>3</sub>) isolated from irradiated **4** (60 Gy) by prep-HPLC.

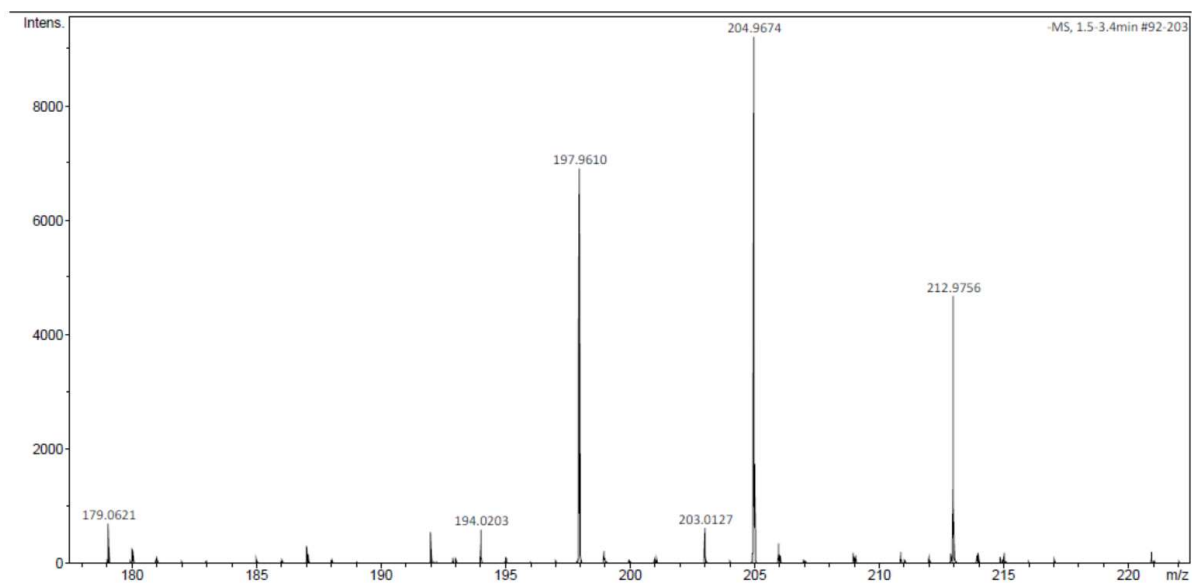

**Fig. S11.** HRMS analysis of **5**, isolated from irradiated **4** (60 Gy) by prep-HPLC. (ESI) for  $C_7H_5F_4NO$   $[M-H]^-$ : *calcd.*: 194.0236; found: 194.0203.

### Model compound **6**

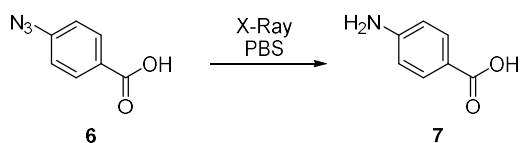

A stock solution of model compound **6** (100 mM in DMSO) was diluted in PBS (20 mL) to give a final concentration of 10  $\mu$ M. The solution was degassed by bubbling Ar for 30 min before X-Ray irradiation. The product was identified by HPLC (identical to compound **7**, CAS 150-13-0).

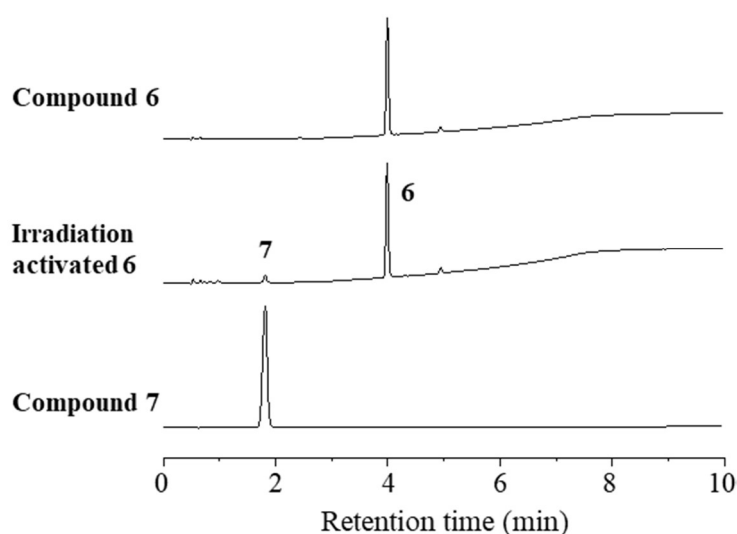

**Fig. S12.** HPLC traces of model compound **6**, irradiation activated **6** and compound **7** (obtained from Sigma-Aldrich).

### Cell culture

Hela cells were cultured in Dulbecco's modified Eagle medium (DMEM) supplemented with 10 % fetal bovine serum (FBS), *L*-glutamine (4 mM) and antibiotics (penicillin and streptomycin, 100 units/mL). Cell culture was performed in a 5 % CO<sub>2</sub> atmosphere at 37 °C in a SteriCult 200 (Hucoa-Erloss) incubator. The cells were passaged using trypsin/EDTA (0.25 % trypsin, 1 mM EDTA) every 2 days.

HUVECs were maintained in 25 mm<sup>3</sup> tissue culture flasks (Corning) in F-12K medium, supplemented with 10 % (v/v) FBS, heparin (100 µg/mL, Sigma) and endothelial cell growth supplement (BD Biosciences) in a cell incubator (37 °C and 5 % CO<sub>2</sub>). The cells were passaged using trypsin/EDTA every 5 days.

### Evaluation of compound cytotoxicity

Compound cytotoxicities were evaluated using an MTT assay. Briefly, Hela and HEVEC cells were seeded in 96-well plates ( $1 \times 10^4$  cells/well) and incubated overnight. The cells were treated with the desired compound at different concentrations in DMEM for 24 h. The media was removed and the cells were washed with PBS ( $\times 3$ ) and incubated with 100  $\mu$ L of 3-(4,5-dimethylthiazol-2-yl)-2,5-diphenyltetrazolium bromide (MTT) solution (1 mg/mL) for 4 h at 37 °C. 100  $\mu$ L of MTT solubilisation solution (10% Triton-X 100 in 0.1 N HCl in isopropanol) was added to each well and the plate was shaken horizontally for 60 min to dissolve the formazan crystals. The absorbances at 570 nm were measured on a multimode plate reader and cell viability was calculated compared to untreated cells.

### Reaction of coumarin azide **8** under X-ray irradiation

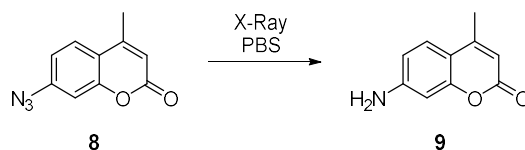

A stock solution of coumarin azide **8** (1 M in DMSO) was diluted in PBS (20 mL) to a final concentration of 100  $\mu$ M. The solution was degassed by bubbling Ar for 30 min before X-Ray irradiation. The fluorescence intensity of the reaction mixtures was analysed. The product **9** was isolated by prep-HPLC and characterised by  $^1\text{H}$ NMR and HRMS.

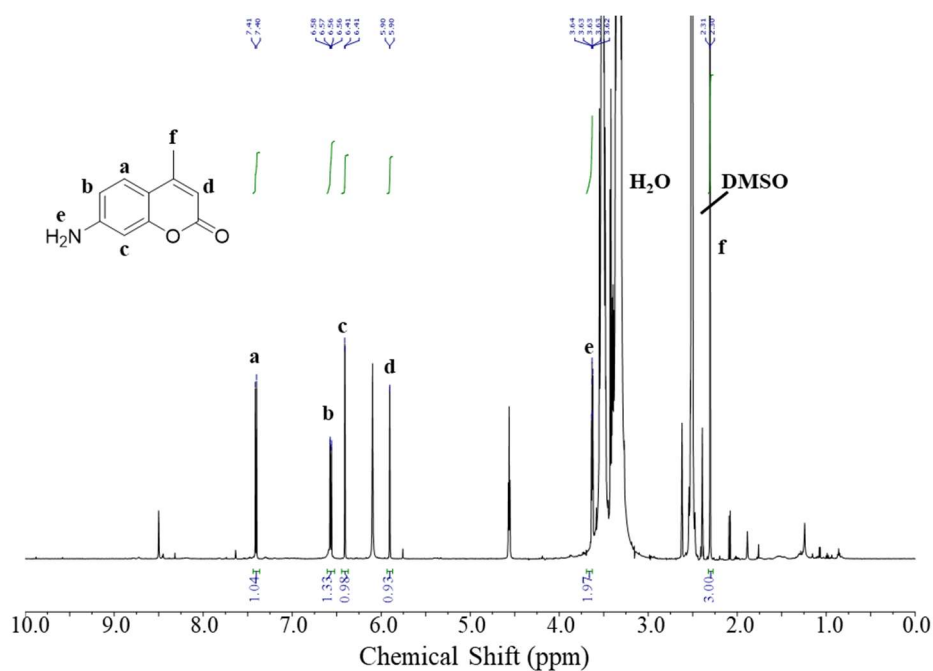

**Fig. S13.** <sup>1</sup>H NMR spectrum of **9** (in d<sub>6</sub>-DMSO) purified from irradiated **8** (60 Gy) by prep-HPLC.

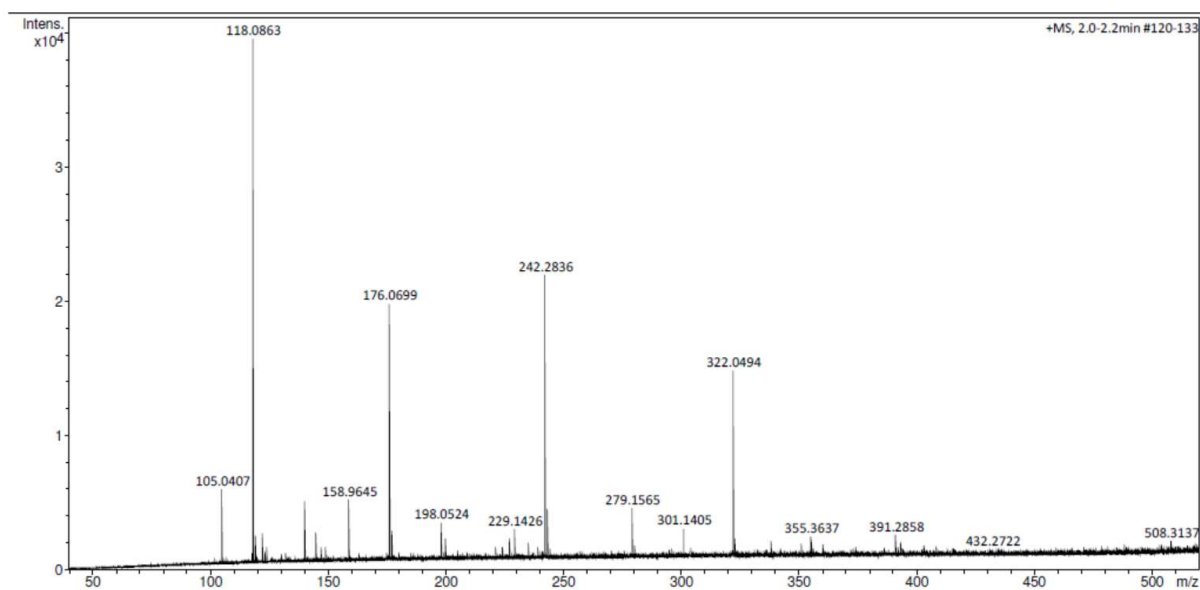

**Fig. S14.** HRMS spectrum of **9**, isolated from irradiated **8** (60 Gy) by prep-HPLC. (ESI) for C<sub>10</sub>H<sub>9</sub>NO<sub>2</sub> [M+H]<sup>+</sup>: *calcd.*: 176.0706; *found*: 176.0699.

### Quantification of the reaction of coumarin azide **8** under X-ray irradiation

The coumarin azide PBS solutions (100  $\mu\text{M}$ ) were irradiated with X-rays with a dose of 0 – 60 Gy. The fluorescence spectra were recorded using a FluoroMax-3 Jobin Yvon Div fluorimeter using a quartz cuvette ( $\lambda_{\text{ex}} = 345 \text{ nm}$ ). An aliquot of each solution was analysed by HPLC and the conversion of the azide was quantified by integration of the HPLC peaks (using a calibration line generated using solutions of known concentrations).

### Reaction of coumarin azide **8** in live cells under X-ray irradiation

Hela cells were seeded in 24-well plates at a density of  $5 \times 10^4$  cells per well and incubated overnight. The cells were then treated with coumarin azide **8** (100  $\mu\text{M}$ ) 1 h prior to irradiation (0, 6, 36 and 60 Gy) and analysed by flow cytometry using a DAPI filter ( $\lambda_{\text{ex/em}} = 360/450 \text{ nm}$ ) and confocal microscopy.

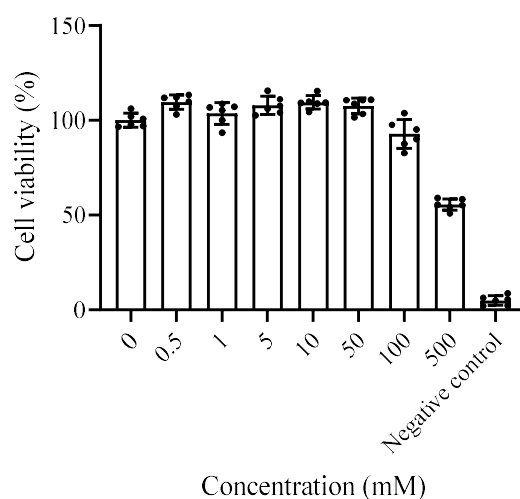

**Fig. S15.** Hela cell viability against coumarin azide **8** (MTT assay, error bars represent standard deviation,  $n = 6$ ). As a negative control, the cells were treated with 50% DMSO in DMEM. The data are presented as mean  $\pm$  SD ( $n = 3$ ). The experiments were repeated, independently, 3 times with similar results observed.

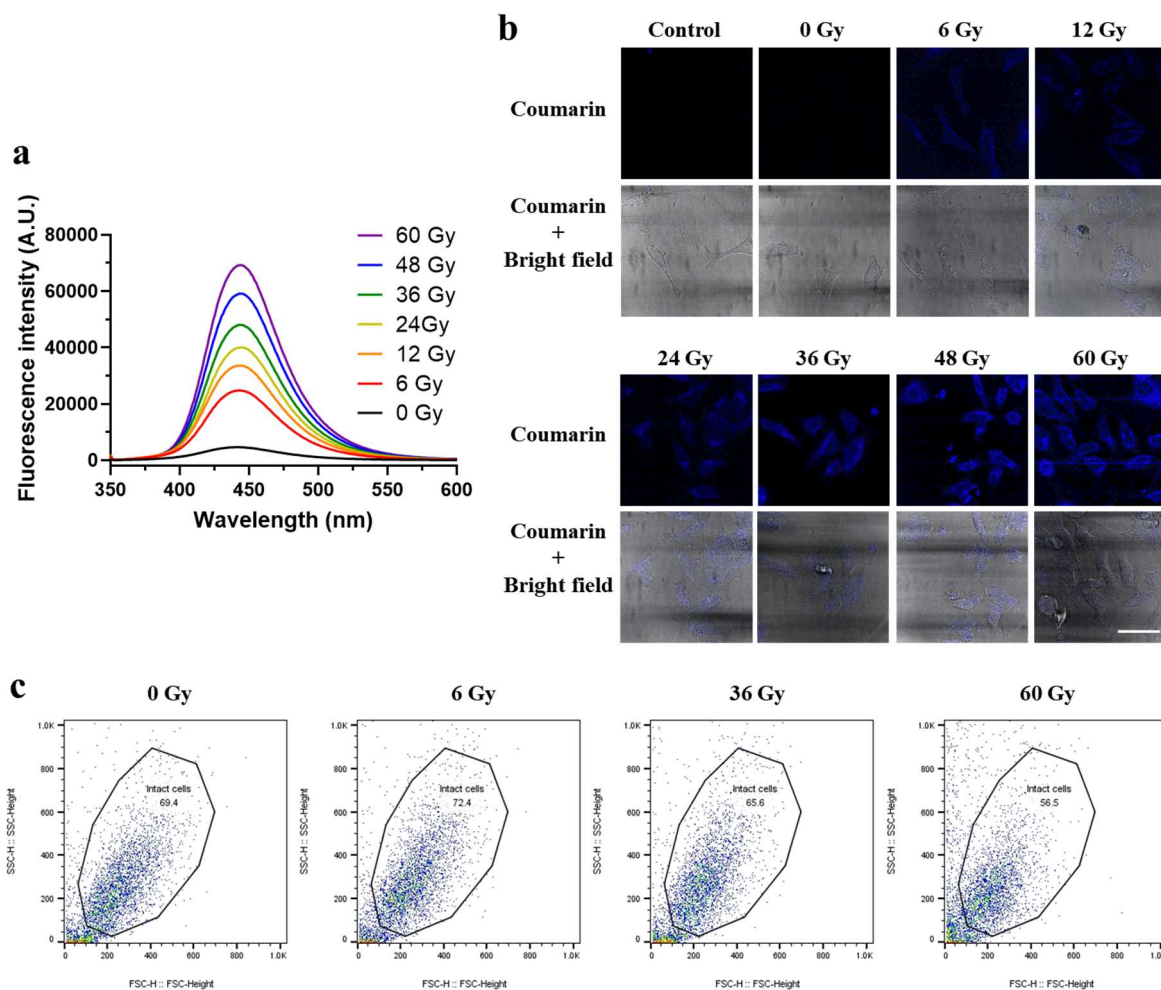

**Fig. S16.** (a) Fluorescence spectrum of **8** (100  $\mu$ M in PBS, pH = 7.4,  $\lambda_{\text{ex/em}}$  = 345/443) with irradiation with 0 Gy to 60 Gy with the fluorescence intensity increasing with irradiation dose. (b) Confocal fluorescence microscopy images of HeLa cells, with and without irradiation, showing degraded fluorescent 7-amino-4-methylcoumarin **9** (blue,  $\lambda_{\text{ex/em}}$  = 360/450 nm) in cells (untreated Hela cells were used as control). Scale bar = 50  $\mu$ m. (c) Graphical account of the gating strategy for the flow cytometry analysis of cells incubated with **8** (100  $\mu$ M). Forward versus side scatter profiles were used to gate intact cellular materials. Flow cytometry analyses are based on a population of 10,000 cells. The experiments were repeated, independently, 4 times with similar results observed.

### Synthesis of prodrug **7**

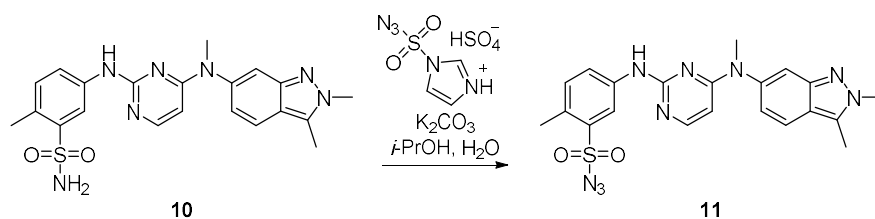

Pazopanib **10** (218 mg, 0.5 mmol) and K<sub>2</sub>CO<sub>3</sub> (276 mg, 2 mmol) were dissolved in 6 mL of a 1:1 mixture H<sub>2</sub>O/*i*-PrOH to which was then added imidazole-1-sulfonylazide hydrochloride (157 mg, 0.75 mmol). After being stirred for 18 h at ambient temperature, the reaction mixture was diluted with saturated NaHCO<sub>3</sub> (30 mL) and extracted with EtOAc (2 × 60 mL). The combined organic phases were washed twice with brine and dried over Na<sub>2</sub>SO<sub>4</sub> and the volatiles evaporated *in vacuo*. The residue was purified by silica gel chromatography (5% MeOH in DCM) to afford the prodrug **11** as a white solid (151 mg, 65%): <sup>1</sup>H NMR (500 MHz, d<sub>6</sub>-DMSO) δ (ppm) = 8.87 (d, *J* = 2.4 Hz 1H), 7.88-7.85 (m, 2H), 7.77 (d, *J* = 8.8 Hz, 1H), 7.46 (s, 1H), 7.39 (d, *J* = 8.4 Hz, 1H), 6.90 (m, 1H), 5.78 (d, *J* = 2.4 Hz 1H), 4.06 (s, 3H), 3.50 (s, 3H), 2.63 (s, 3H), 2.52 (s, 3H); <sup>13</sup>C NMR (125 MHz, d<sub>6</sub>-DMSO) δ (ppm) = 162.40, 159.13, 155.76, 146.96, 141.74, 140.02, 135.66, 133.37, 132.21, 128.47, 124.36, 121.93, 119.55, 117.94, 114.05, 97.14, 48.59, 37.97, 37.38, 18.98, 9.41.; IR (solid) cm<sup>-1</sup>: 2934, 2848, 2123, 1734, 1614, 1573., 1517, 1423, 1402, 1361, 1234, 1163; HRMS (ESI) for C<sub>21</sub>H<sub>21</sub>N<sub>9</sub>O<sub>2</sub>S [M+H]<sup>+</sup>: *calcd.*: 464.1612; found: 464.1604.

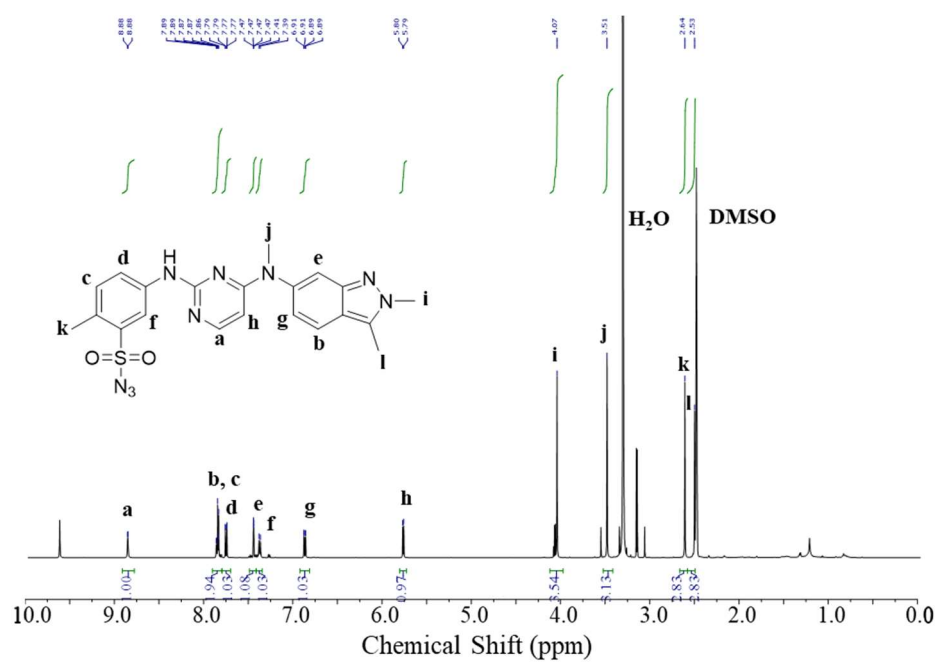

**Fig. S17.**  $^1\text{H}$  NMR spectrum of prodrug **11** in  $\text{d}_6$ -DMSO.

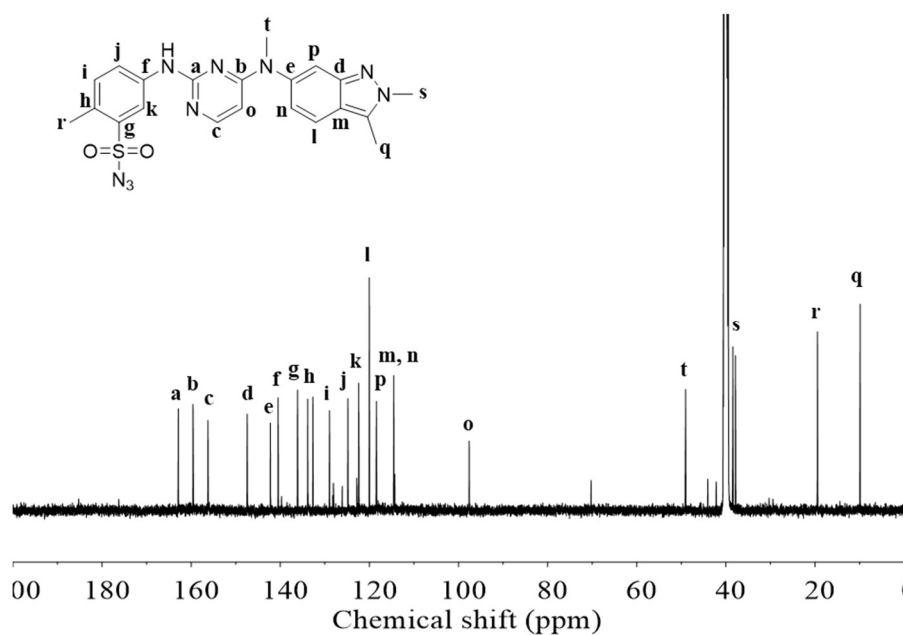

**Fig. S18.**  $^{13}\text{C}$  NMR spectrum of prodrug **11** in  $\text{d}_6$ -DMSO.

### Reaction of prodrug **11** under X-ray irradiation

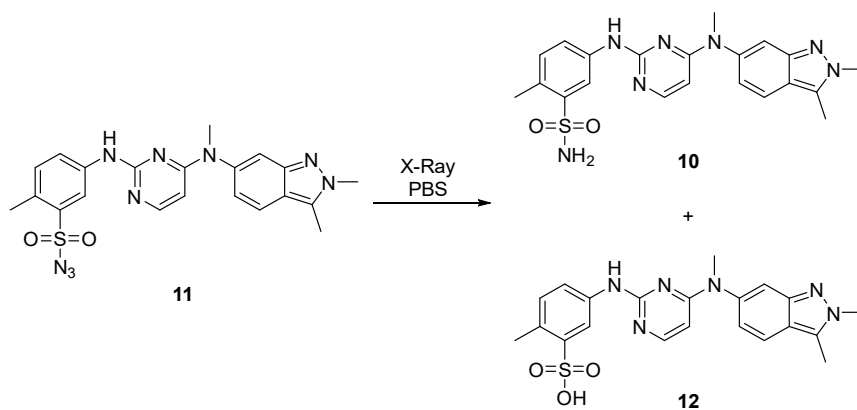

A stock solution of prodrug **11** (100 mM in DMSO) was diluted in PBS (20 mL) to a final concentration of 20  $\mu$ M. The solution was degassed by bubbling Ar for 30 min before X-Ray irradiation. The reaction mixture was analysed by FTIR and the products **10** and **12** were isolated by prep-HPLC and characterised by  $^1\text{H}$ NMR and HRMS.

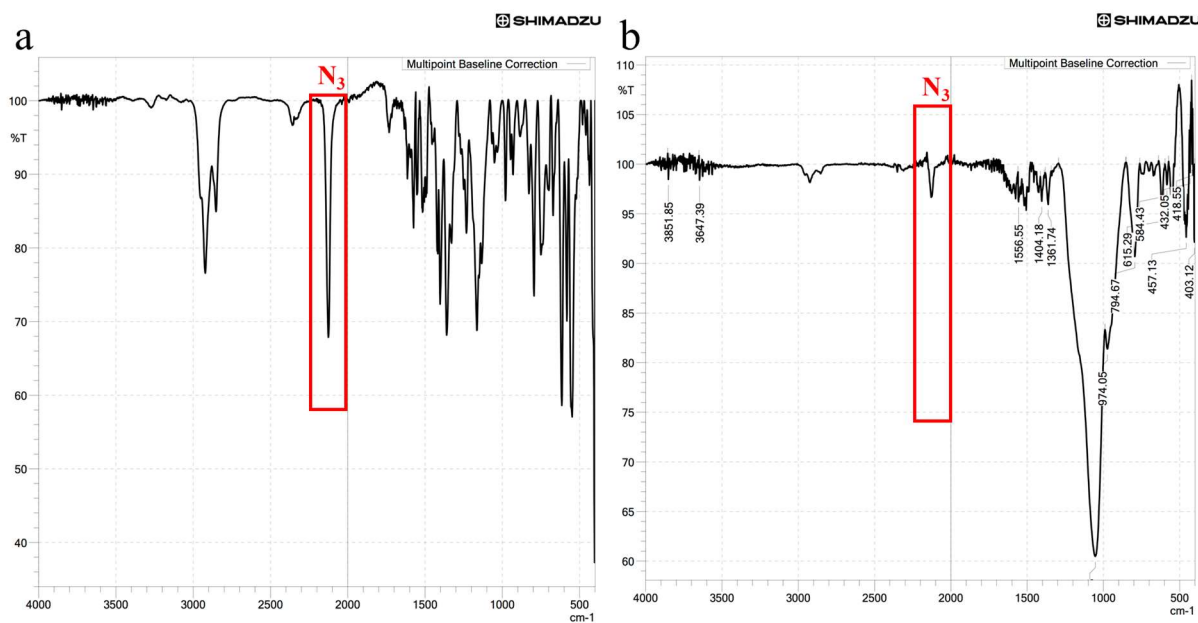

**Fig. S19.** FTIR spectrum of compound (a) prodrug **11** and (b) irradiated prodrug **11** (60 Gy).

The decreased intensity of the azide signal ( $2134.1 \text{ cm}^{-1}$ ) indicated the consumption of prodrug **11**.

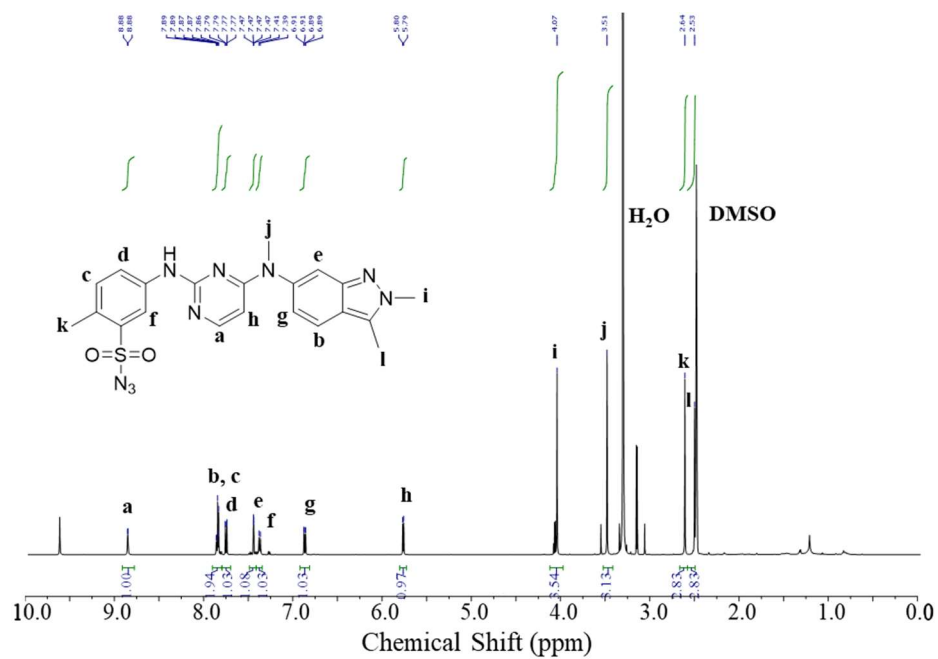

**Fig. S20.**  $^1\text{H}$  NMR spectrum of **10** (in  $\text{d}_4\text{-MeOD}$ ) purified from irradiated prodrug **11** (60 Gy) by prep-HPLC.

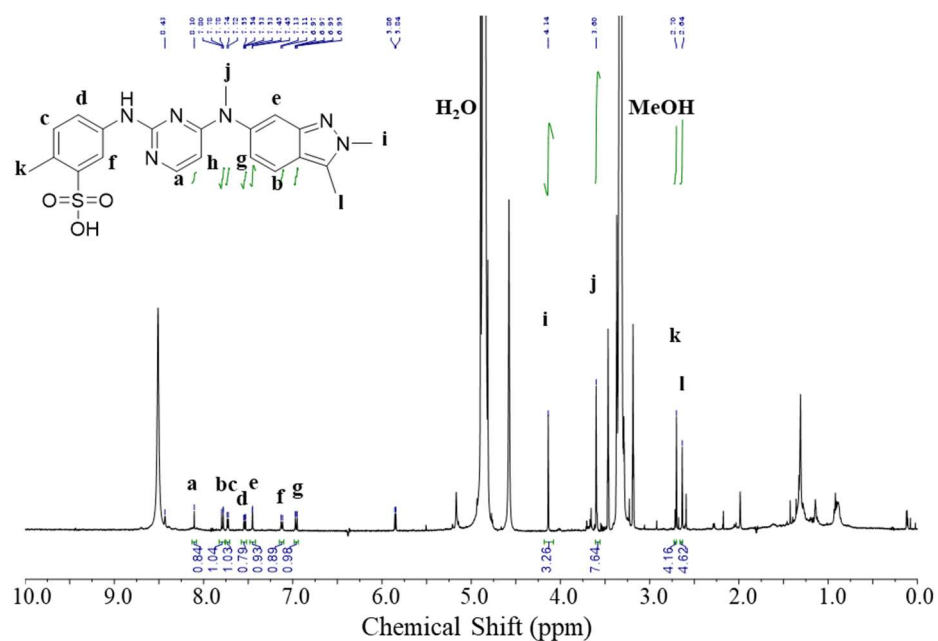

**Fig. S21.**  $^1\text{H}$  NMR spectrum of **12** (in  $\text{d}_4\text{-MeOD}$ ) isolated from irradiated prodrug **11** (60 Gy) by prep-HPLC.

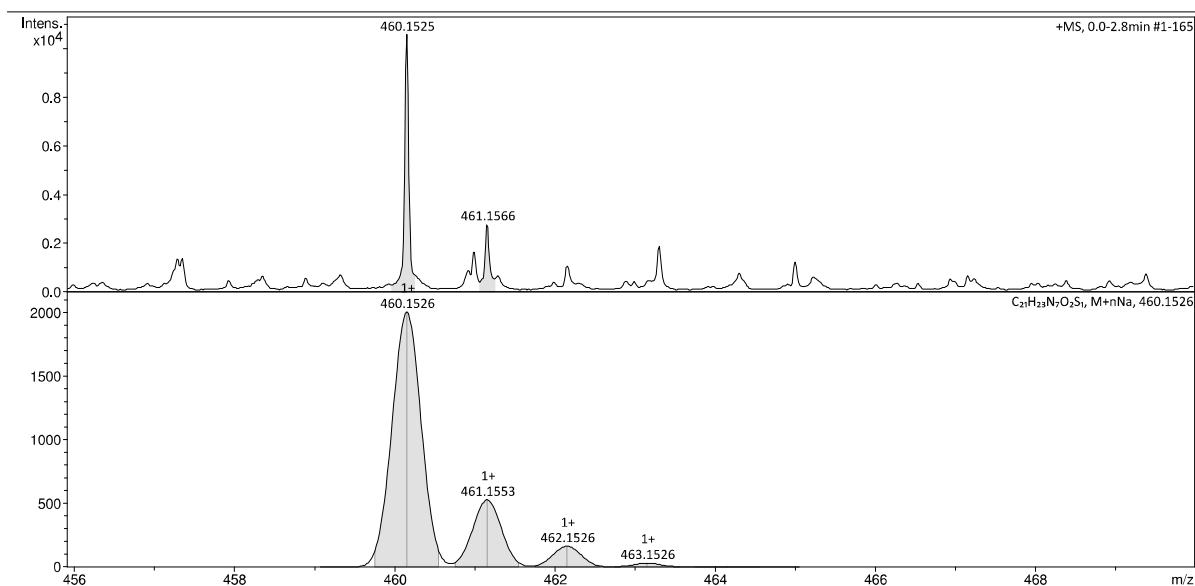

**Fig. S22.** HRMS spectrum of **10**, isolated from an irradiated prodrug **11** (60 Gy) by prep-HPLC. (ESI) for  $C_{21}H_{23}N_7O_2S [M+Na]^+$ : *calcd.*: 460.1526; found: 460.1525.

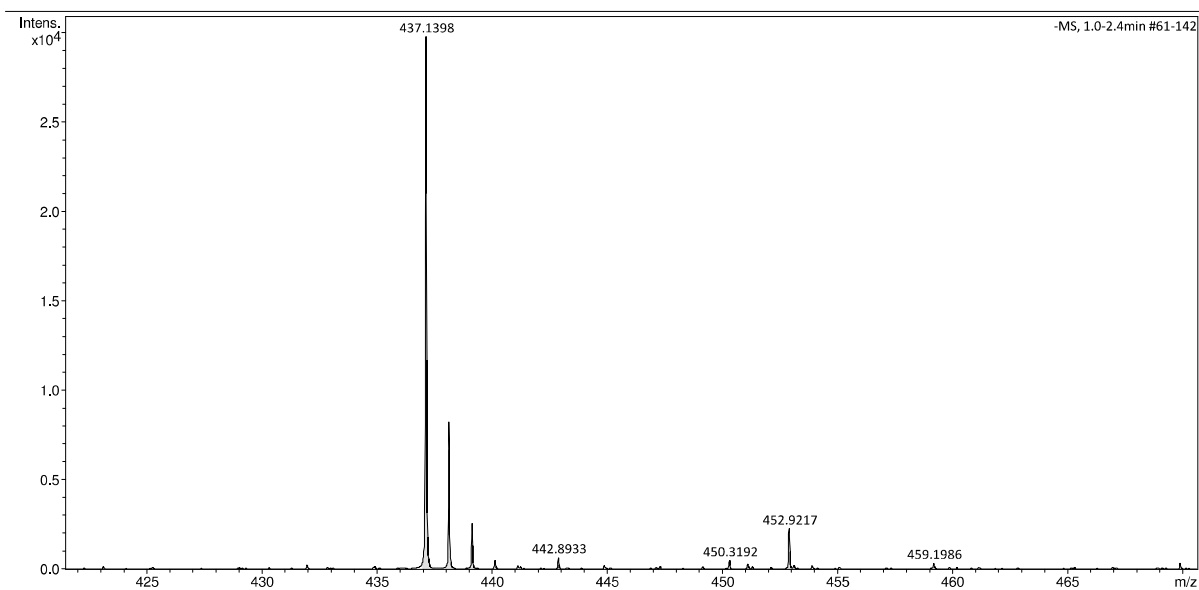

**Fig. S23.** HRMS of **12**, isolated from irradiated prodrug **11** (60 Gy) by prep-HPLC. (ESI) for  $C_{21}H_{22}N_6O_3S [M-H]^-$ : *calcd.*: 437.1401; found: 437.1398.

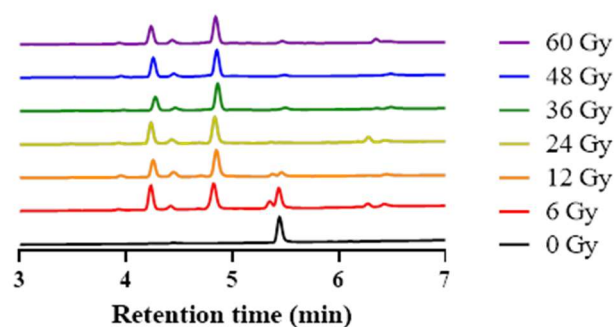

**Fig. S24.** HPLC traces of the reaction mixture of prodrug **11** ( $R_T = 5.44$  min) after irradiation with 6 Gy to 60 Gy (without degassing). The reaction afforded product **10** ( $R_T = 4.23$  min) and **12** ( $R_T = 4.83$  min) with some remaining unreacted prodrug **11**.

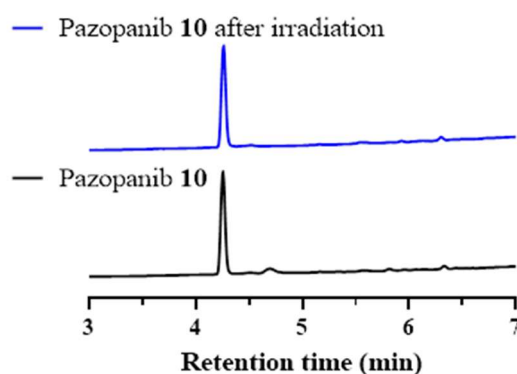

**Fig. S25.** HPLC traces (254 nm) of pazopanib **10** before and after X-ray irradiation (60 Gy).

### Cell viability upon treatment of the pazopanib **10** and prodrug **11** before and after X-ray irradiation

Viability of HUVEC were evaluated by a Celltiter Glo<sup>®</sup> assay. HUVECs were seeded in an opaque-walled 96-well plate at a density of  $1 \times 10^4$  cells per well and incubated overnight. The cells were then treated with pazopanib **10**, prodrug **11** and irradiated prodrug **11** (60 Gy) at concentrations of 5, 10 and 20  $\mu\text{M}$  for 24, 48 h. The medium was replaced with fresh medium and 100  $\mu\text{l}$  of CellTiter-Glo<sup>®</sup> 2.0 reagent was added directly to the culture media and the content was mixed for 2 minutes on an orbital shaker followed by 10 min incubation at RT. The

luminescence was measured by a plate reader. Cell viability was calculated compared to untreated cells. All of the experiments were repeated three times.

### **Cell proliferation assay of pazopanib **10** and prodrug **11** before and after X-ray irradiation**

Proliferation of HUVEC were evaluated by a Click iT<sup>®</sup> EdU assay. Briefly, HUVECs were seeded in a 24-well plate at a density of  $5 \times 10^4$  cells per well and incubated overnight. The cells were then treated with pazopanib **10**, prodrug **11** and irradiated prodrug **11** at concentrations of 10 and 20  $\mu$ M for 24 h and washed gently with PBS before fresh media were added. A solution of EdU was added (10  $\mu$ M) to each well and incubated for 4 h. The cells were harvested and washed with PBS (containing 1% BSA) before permeabilisation with saponin (0.1% w/v) and fixation with 4% PFA. The fixed cells were treated with Click-iT<sup>®</sup> reaction cocktail (1  $\times$ ), incubated for 30 min, washed with PBS (containing 1% BSA) and analysed by flow cytometry using a FITC filter ( $\lambda_{\text{ex/em}}$  = 488/525 nm).

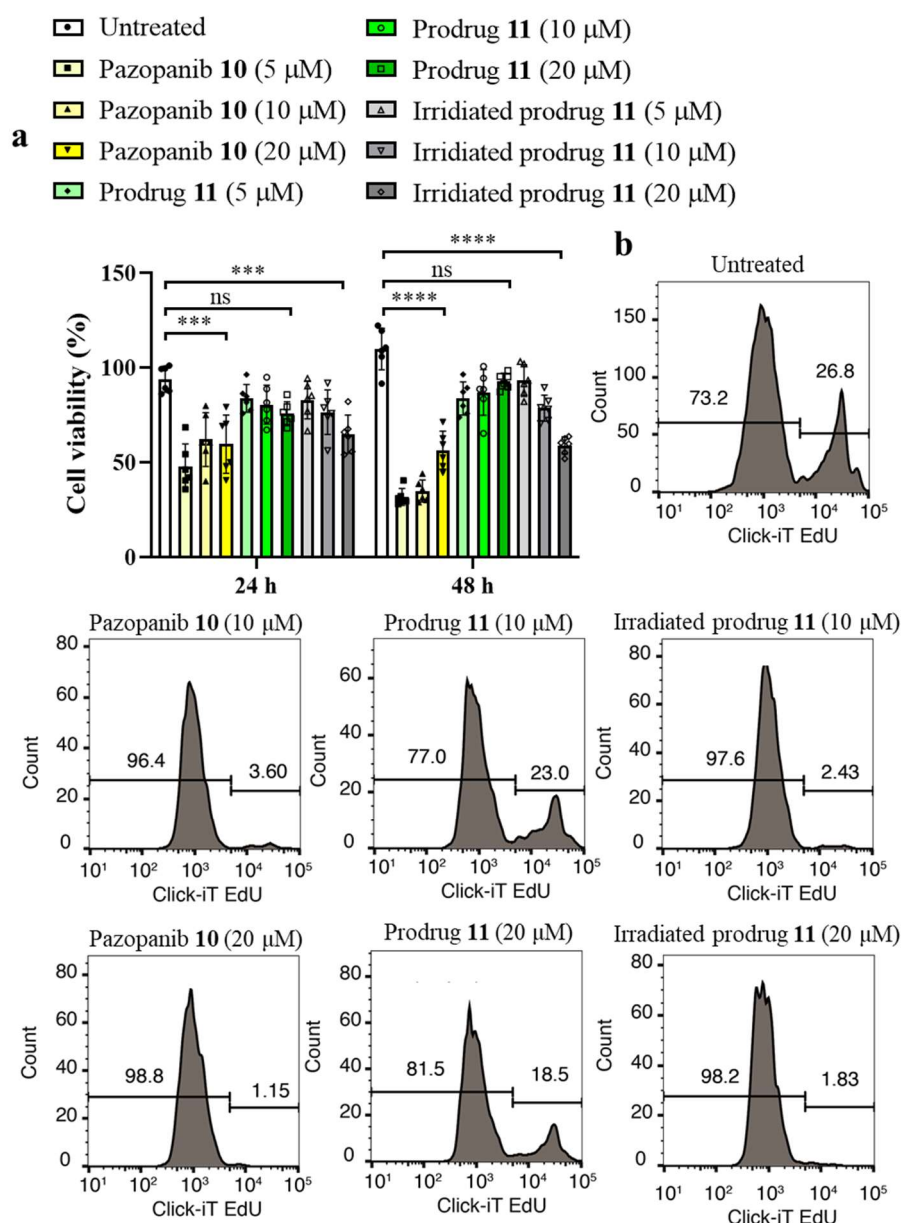

**Fig. S26.** HUVECs viability and proliferation as affected by pazopanib **10** and irradiation activated prodrug **11**. **(a)** Hela cell viabilities were analysed using a Celltiter Glo<sup>®</sup> assay. The cells ( $1 \times 10^4$  per well) were treated with pazopanib **10** prodrug **11** and irradiation activated prodrug at the concentrations of 5  $\mu$ M, 10  $\mu$ M and 20  $\mu$ M for 24 hours and 48 hours at 37  $^{\circ}$ C. Data represent the mean  $\pm$  SD,  $n = 6$  independent experiments. Significant differences were analysed using one-way analysis of variance followed by Sidak's multiple comparison test compared to an untreated control group (ns, not significant, \*\*\*  $P = 0.0003$ , \*\*\*\*  $P < 0.0001$ ). **(b)** Proliferation of HUVEC were evaluated by Click-iT<sup>®</sup> EdU assay. The cells ( $5 \times 10^4$  per

well) were treated with pazopanib **10** prodrug **11** and irradiation activated prodrug at the concentrations of 10  $\mu$ M and 20  $\mu$ M for 24 hours and analysed by flow cytometry using a FITC filter ( $\lambda_{\text{ex/em}} = 488/525$  nm). Forward versus side scatter profiles were used to gate-in intact cellular materials (remove cell debris). Flow cytometry analyses are based on a population of 10,000 cells. The experiments were repeated, independently, 3 times with similar results observed.

### **Long term viability affected by pazopanib 10 and prodrug 11 before and after X-ray irradiation**

Long term viability of HUVEC was evaluated by Celltiter Glo<sup>®</sup> assay. HUVECs were seeded in an opaque-walled 96-well plate at a density of  $1 \times 10^4$  cells per well and incubated overnight. The cells were then treated with prodrug **11** at 0, 5 and 10  $\mu$ M for 4 h and irradiated with x-ray for 0, 6, 12 and 24 Gy. The medium was replaced and cells were incubated in fresh media for 24, 48 and 72 h, and 100  $\mu$ l of CellTiter-Glo<sup>®</sup> 2.0 reagent was added directly to the culture media and the content was mixed for 2 minutes on an orbital shaker followed by 10 min incubation at RT. Luminescence was measured by a plate reader ( $n = 6$ ). The experiments were repeated three times.

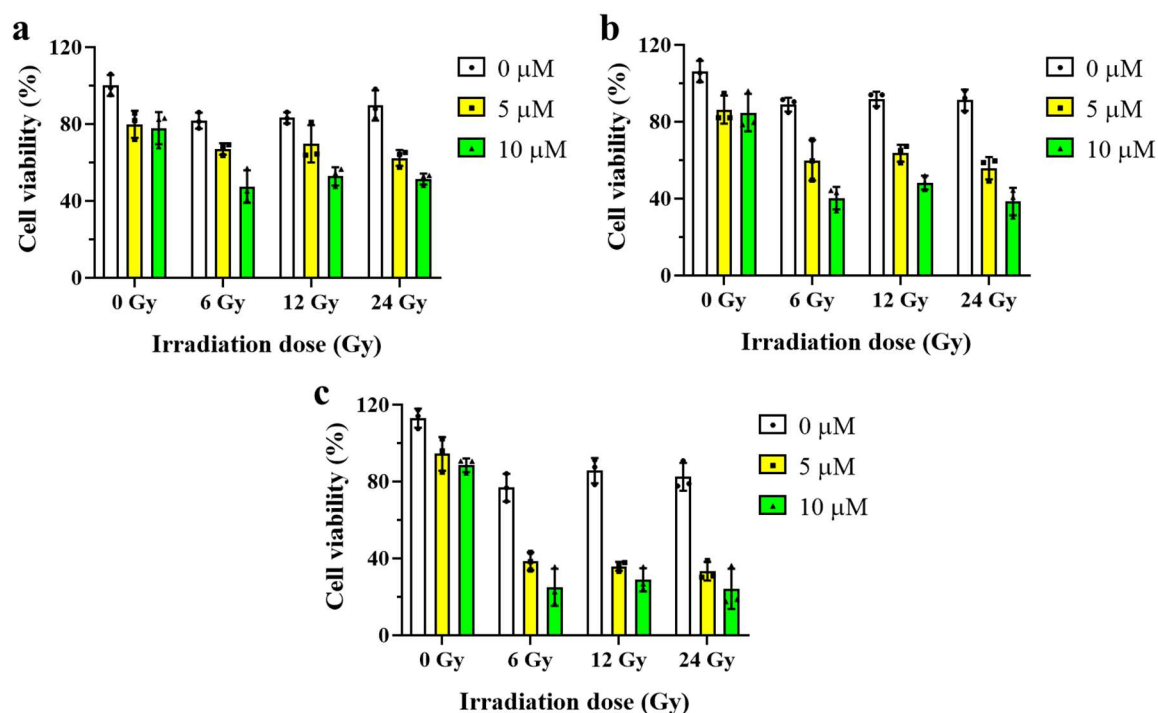

**Fig. S27.** (a) 24 h, (b) 48 h and (c) 72 h HUVECs viability (Celltiter Glo<sup>®</sup> assay) following exposure to prodrug **11** with different irradiation doses. Data represent the mean  $\pm$  SD,  $n = 3$  independent experiments. The experiments were repeated, independently, 5 times with similar results observed.

### Transwell migration assay for pazopanib **10** and prodrug **11** before and after X-ray irradiation

HUVECs were starved by incubation in Endothelial Cell Growth Medium (serum free, Sigma) containing 0.1% fatty acid-free BSA for 4 h prior to the experiment. Serum free endothelial cell growth media (25  $\mu$ L) with and without addition of VEGF (100 ng/mL) to the bottom well and the starved cells were harvested into the same medium and re-seeded in the top insert of a Corning<sup>®</sup> HTS Transwell<sup>®</sup> 96 well permeable supports at a density of  $2 \times 10^5$  cells per well and treated with pazopanib **10**, prodrug **11** and irradiated prodrug **11** at concentrations of 5  $\mu$ M, 10  $\mu$ M and 20  $\mu$ M for 24 h. The top insert was removed and the migrated cells in bottom wells were washed with PBS for 3 times and stained with Hoechst 33342 before fixation with 4%

PFA and imaged using the bright field channel and DAPI ( $\lambda_{\text{ex}} = 340\text{-}395\text{ nm}$ ,  $\lambda_{\text{em}} = 430\text{-}505\text{ nm}$ ) channel on a Zeiss AxioVert 200M fluorescent microscope. Cells were counted based on their nuclear staining and the cell morphology.

### **Wound healing assay for pazopanib **10** and prodrug **11** before and after X-ray irradiation**

HUVECs were seeded in Ibidi® Culture-Insert 2 Well  $\mu$ -Dish at a density of  $2 \times 10^4$  cell per well (in 70  $\mu\text{L}$  media) and incubated at 37 °C overnight. To each well, pazopanib **10**, prodrug **11** and irradiated prodrug **11** at concentrations of 10 and 20  $\mu\text{M}$  were added and incubated at 37 °C for 24 h, followed by gentle washing with PBS ( $3 \times 70\text{ }\mu\text{L}$ ). Fresh media (70  $\mu\text{L}$ ) was added and the insert modes were removed, followed by addition of fresh media (2 mL) to the dish. Bright field microscopy images were taken at  $t = 0, 2\text{h}, 4\text{h}$  and  $6\text{h}$ , and the width of the void between cells measured using ImageJ with the “Wound Healing Tool” plugin, using the variance method.

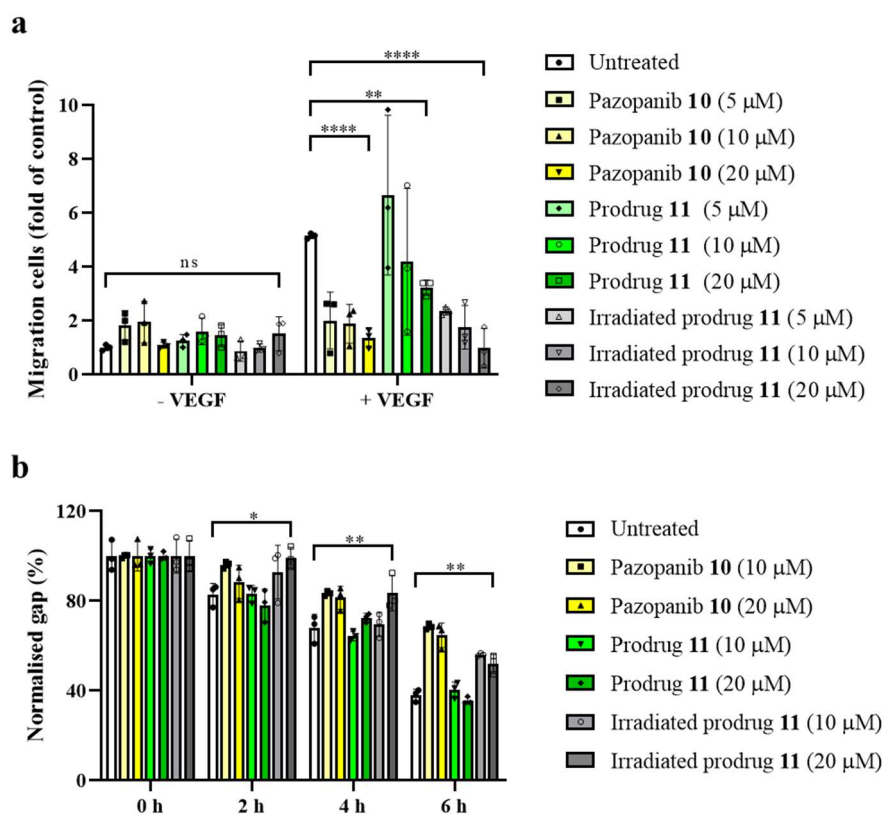

**Fig. S28. (a)** Transwell migration assay of HUVEC cells treated with pazopanib **10**, prodrug **11** and irradiated prodrug. The data are presented as mean  $\pm$  SD ( $n = 3$  independent samples for each group). Significant differences were analysed using one-way analysis of variance followed by Sidak's multiple comparison test compared to an untreated control group (ns, not significant, \*\*  $P = 0.0075$ , \*\*\*\*  $P < 0.0001$ ). **(b)** Wound healing experiments of HUVEC cells. The normalised gaps vs time (calculated as the ratio of the remaining gap area at the given time point and at  $t = 0$  h). Data represent the mean  $\pm$  SD,  $n = 3$  independent experiments. Significant differences were analysed using one-way analysis of variance followed by Sidak's multiple comparison test compared to an untreated control group (\*  $P = 0.0135$ , \*\*  $P = 0.0021$ ). The experiments were repeated, independently, 3 times with similar results observed.

### Endothelial tubule formation assay for pazopanib **10** and prodrug **11** before and after X-ray irradiation

HUVECs were starved by incubation in Endothelial Cell Growth Medium (serum free, Sigma) containing 0.1% fatty acid-free BSA for 4 h prior to the experiment. The starved cells were harvested into the same medium and re-seeded in a 96-well plate coated with Matrigel Matrix(Corning) at a density of  $5 \times 10^3$  cells per well, treated with prodrug **11** at concentrations of 0, 5 and 10  $\mu\text{M}$  and irradiated with X-ray at 0, 6, 12 and 24 Gy. Tube formation was assessed by photography using the bright field channel 24 h after plating.

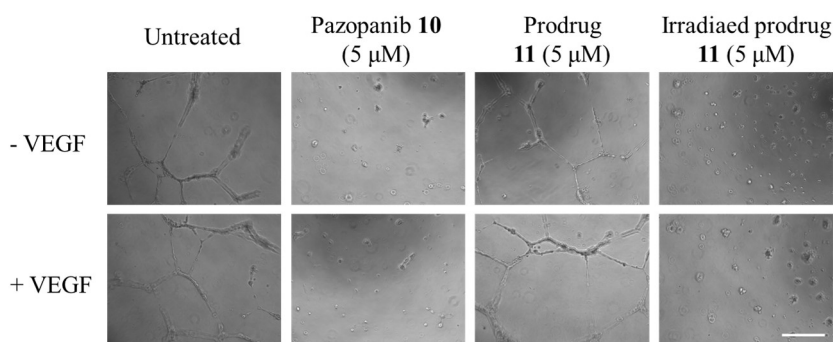

**Fig. S29.** HUVEC tubule formation affected by pazopanib **10**, prodrug **11**, and irradiated prodrug **11**, with and without supplement of VEGF. Scale bar = 200  $\mu\text{m}$ . The experiments were repeated, independently, 3 times with similar results observed.

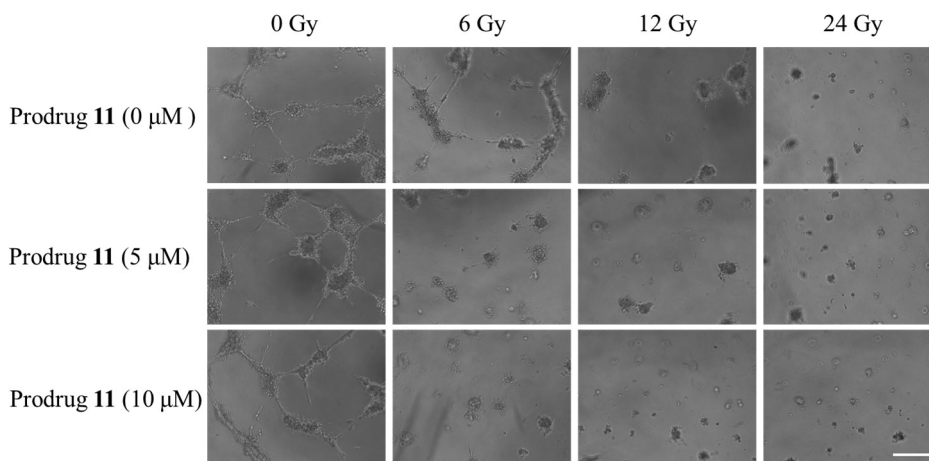

**Fig. S30.** HUVEC tubule formation affected by pazopanib **10**, prodrug **11**, and irradiated prodrug **11** with different irradiation dose. Scale bar = 200  $\mu$ m. The experiments were repeated, independently, 3 times with similar results observed.

### Synthesis of doxorubicin prodrug **13**

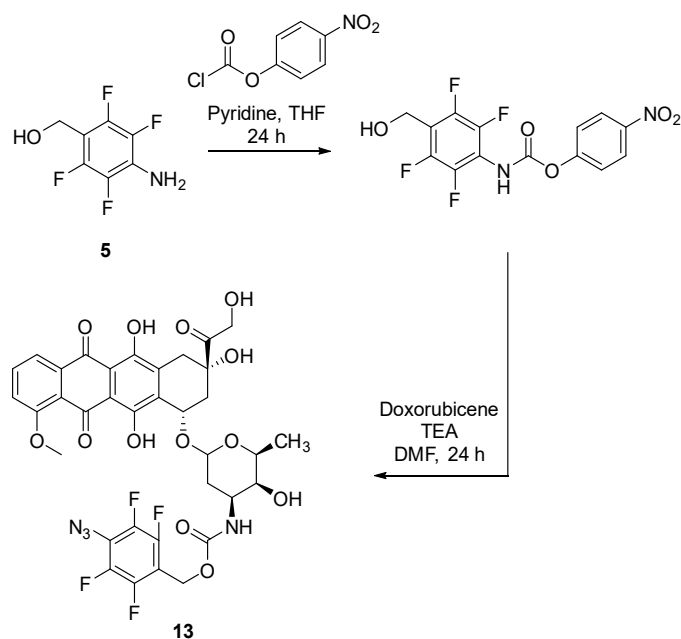

Compound **13** was synthesised following a reported procedure giving a dark red solid in an 81% yield (39 mg).<sup>3</sup>

$^1\text{H}$  NMR (500 MHz,  $d\text{-CDCl}_3$ )  $\delta$  (ppm) = 14.02 (s, 1H), 13.30 (s, 1H), 8.08 (d,  $J$  = 7.7 Hz, 1H), 7.82 (dd,  $J$  = 8.5, 7.7 Hz, 1H), 7.43 (dd,  $J$  = 8.5, 1.1 Hz, 1H), 5.52 (d,  $J$  = 4.0 Hz, 1H), 5.32 (s,

1H), 5.15 (s, 2H), 5.11 (m, 1H), 4.78 (m, 2H), 4.51 (s, 1H), 4.17 (m, 1H), 4.12 (s, 3H), 3.88 (s, 1H), 3.68 (s, 1H), 3.36 – 3.29 (m, 1H), 3.00 (m, 1H), 2.36 (d,  $J = 14.8$  Hz, 1H), 2.24 – 2.16 (m, 1H), 1.91 (m, 2H), 1.79 (m, 1H), 1.31 (d,  $J = 6.5$  Hz, 3H);  $^{13}\text{C}$  NMR (125 MHz,  $\text{d-CDCl}_3$ )  $\delta$  (ppm) = 213.3, 186.2, 186.1, 169.6, 156.2, 155.8, 154.7, 145.4, 140.2, 135.3, 135.2, 120.5, 119.7, 118.7, 110.1, 100.8, 77.3, 76.0, 69.9, 69.8, 69.4, 67.2, 65.2, 56.7, 56.6, 53.9, 46.8, 35.6, 33.9, 29.9, 16.9, 16.8; HRMS (ESI) for  $\text{C}_{35}\text{H}_{30}\text{F}_4\text{N}_4\text{O}_{13}$   $[\text{M}+\text{Na}]^+$ : *calcd.*: 813.1638; *found*: 813.1632. Data were in agreement with the literature.<sup>3</sup>

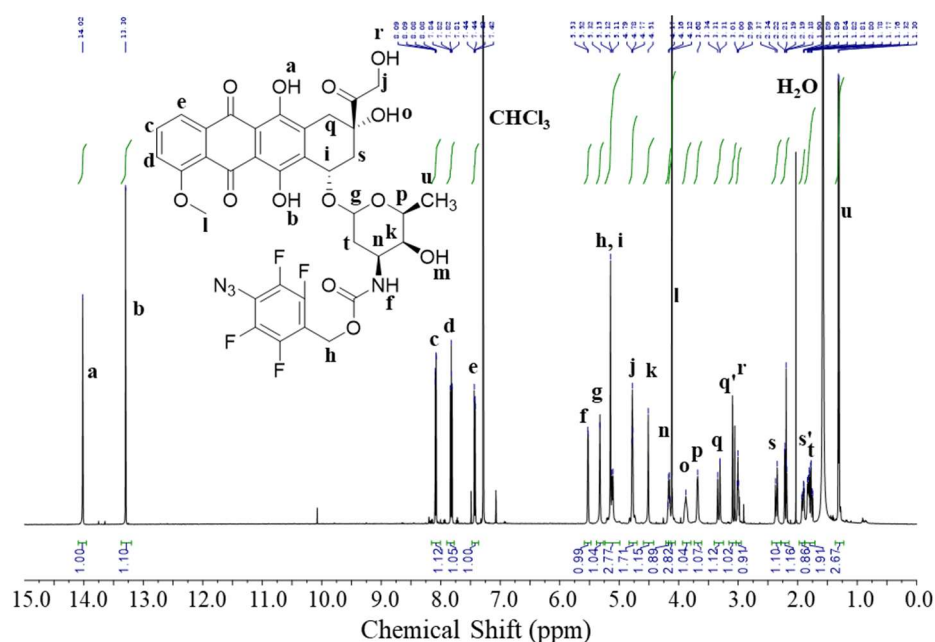

**Fig. S31.**  $^1\text{H}$  NMR spectrum of prodrug **13** in  $\text{CDCl}_3$ .

## Reaction of prodrug **13** under X-ray irradiation

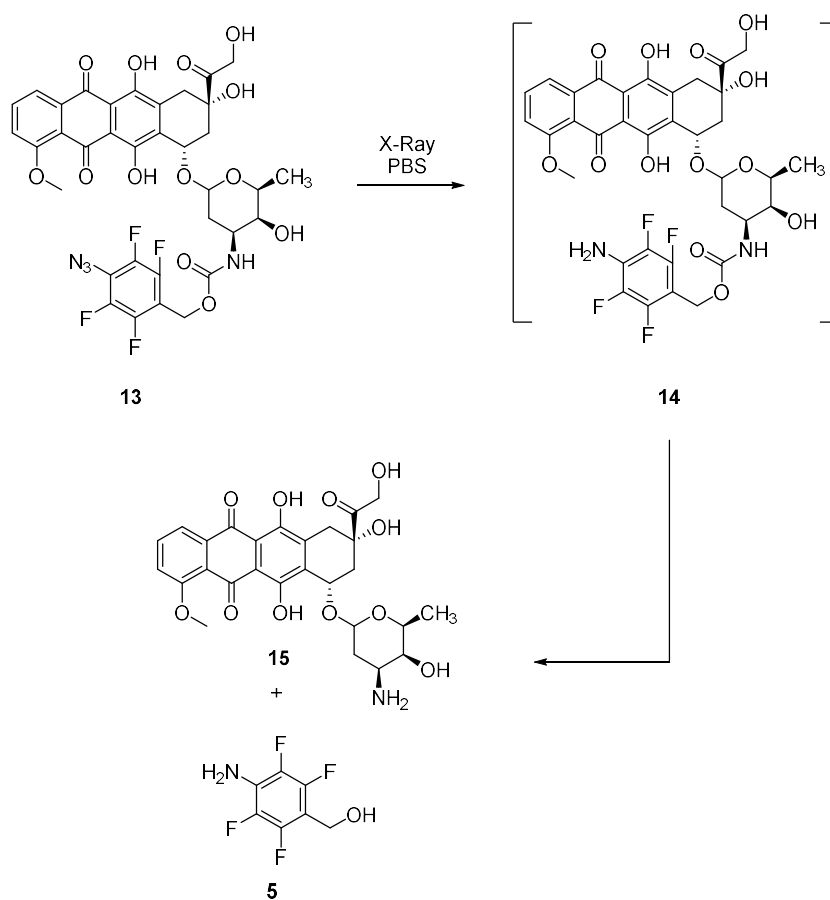

A stock solution of doxorubicin prodrug **13** (100 mM in DMSO) was diluted in PBS (20 mL, with 0.1%, v/v Triton X100) to give a final concentration of 20  $\mu$ M. The solution was degassed by bubbling Ar for 30 min before X-Ray irradiation. The reaction mixture was analysed by FTIR and the products doxorubicin **15** and compound **5** were isolated by prep-HPLC and characterised  $^1\text{H}$ NMR and HRMS. (Note compound **15** and **5** co-eluted on the HPLC).

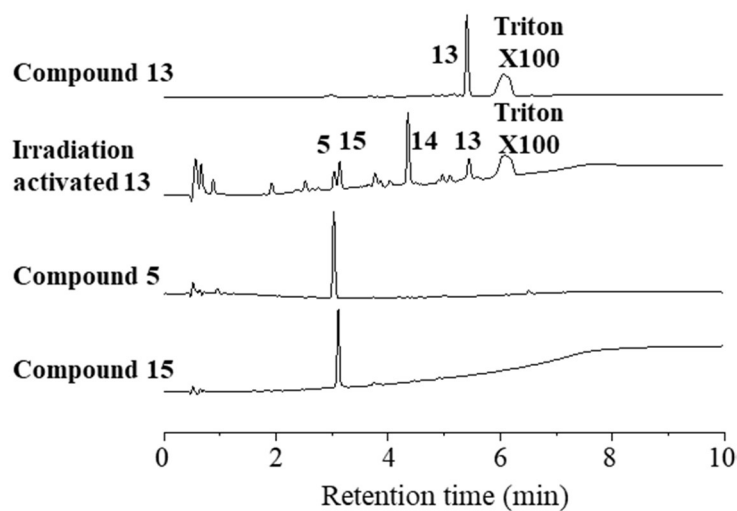

**Fig. S32.** HPLC traces of doxorubicin prodrug **13**, irradiation activated prodrug **13**, compound **5** and doxorubicin **15** (obtained from Sigma-Aldrich).

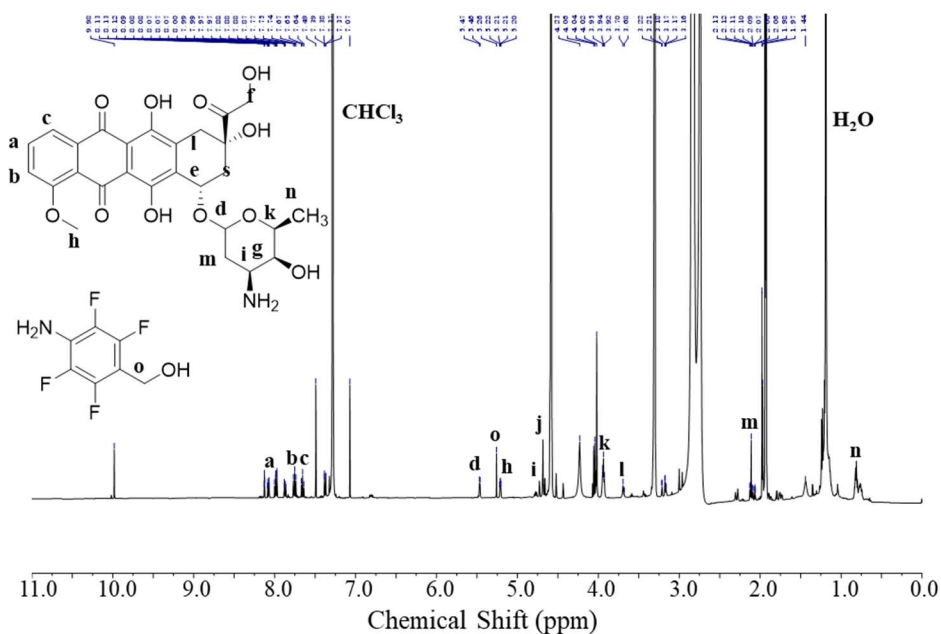

**Fig. S33.**  $^1\text{H}$  NMR spectrum of the mixture of doxorubicin **15** and compound **5** in  $\text{CDCl}_3$  collected from a sample of irradiated prodrug **13** (60 Gy) by prep-HPLC (the two compounds were co-eluted, and could not be separated).

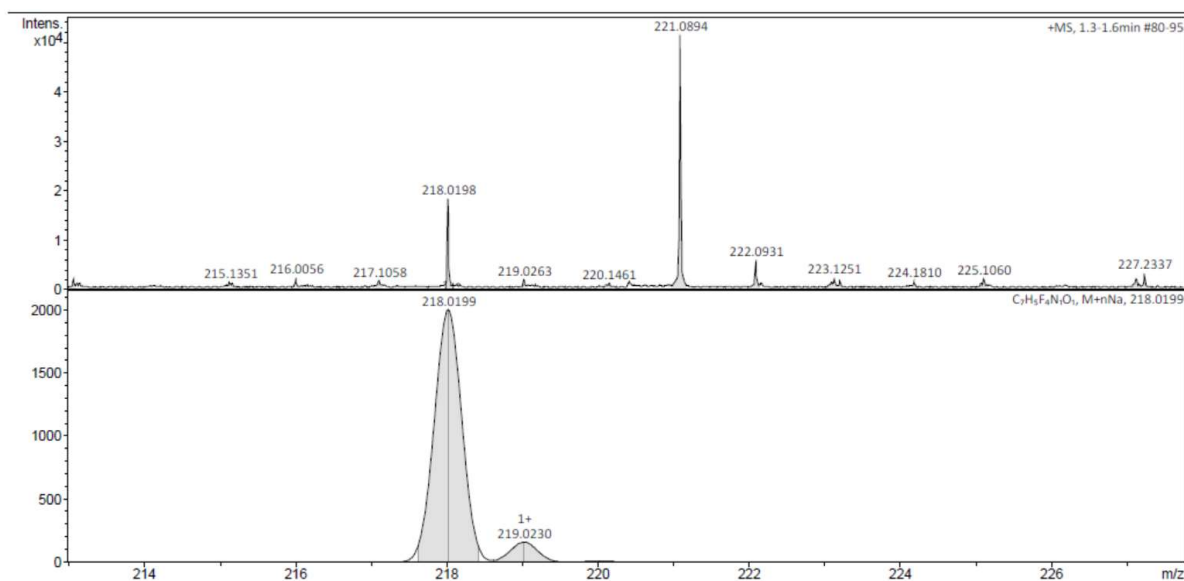

**Fig. S34.** HRMS spectrum of the mixture of compound **5** and doxorubicin **15** collected from the mixture of irradiated prodrug **13** (60 Gy) by prep-HPLC, showing the mass for compound **5**, (ESI)  $C_7H_5F_4NO$   $[M+Na]^+$ : *calcd.*: 218.0199; found: 218.0198.

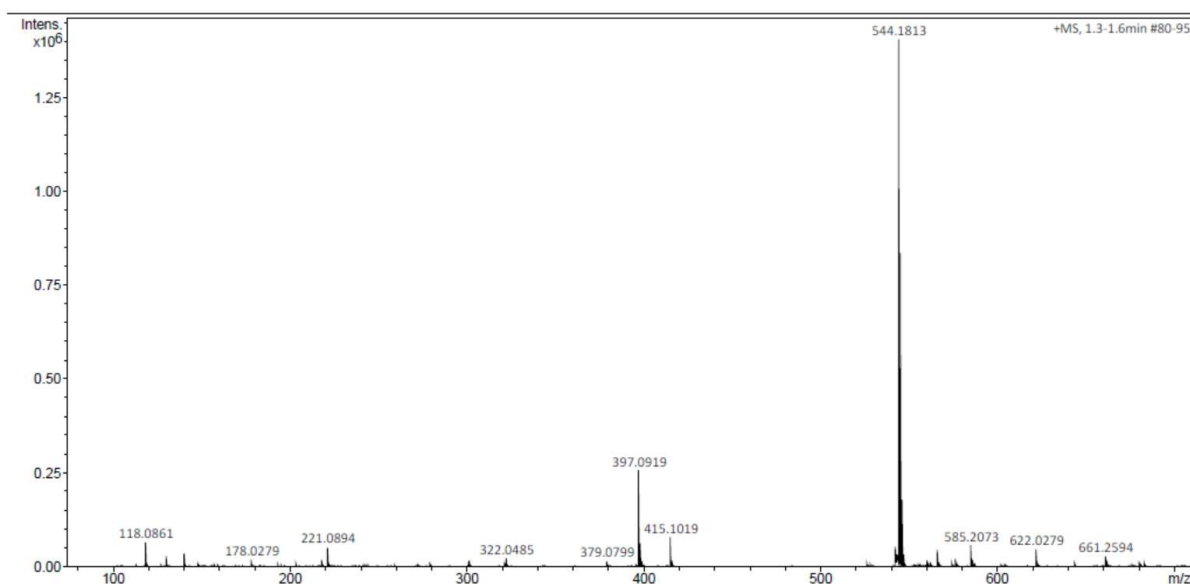

**Fig. S35.** HRMS spectrum of the mixture of compound **5** and doxorubicin **15** collected from the mixture of irradiated prodrug **13** (60 Gy) by prep-HPLC, showing the mass for doxorubicin **15**, (ESI) for  $C_{27}H_{29}NO_{11}$   $[M+H]^+$ : *calcd.*: 544.1813; found: 544.1813.

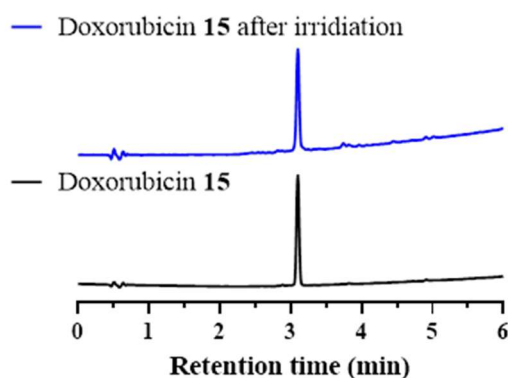

**Fig. S36.** HPLC traces (254 nm) of doxorubicin **15** before and after X-ray irradiation (60 Gy).

### Cell viability against prodrug **13** before and after X-ray irradiation

HeLa cell viability was evaluated using an MTT assay as described above. The cells were treated with prodrug **13** (0.5, 1, 5 and 10  $\mu\text{M}$ ) for 4 h, and irradiated with X-ray at 0 Gy, 6 Gy, 12 Gy, 24 Gy, 36 Gy, 48 Gy and 60 Gy. Cells treated with 50% DMSO in DMEM were used as a negative control.

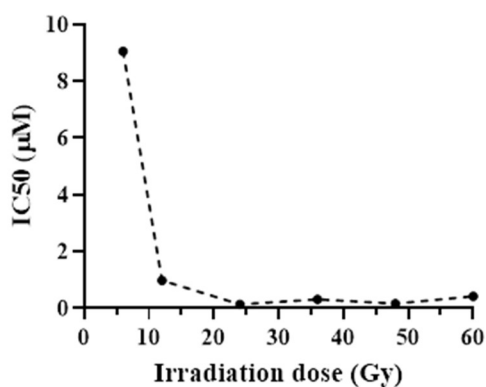

**Fig. S37.** Plot of IC<sub>50</sub> values concluded from MTT assay of HeLa cells treated with of prodrug **13** with 6 to 60 Gy X-ray irradiation.

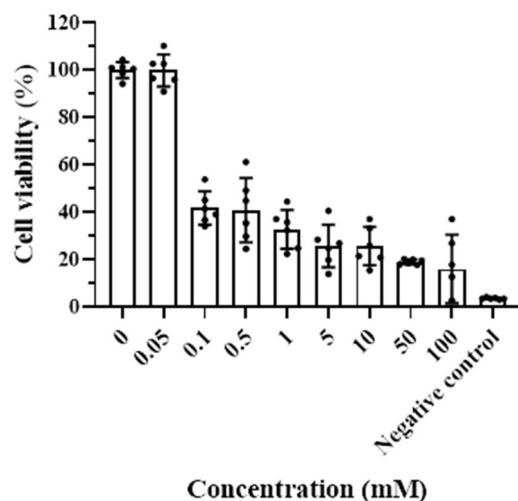

**Fig. S38.** Plot of IC<sub>50</sub> values concluded from MTT assays of HeLa cells treated with prodrug **13** following 6 to 60 Gy X-ray irradiation. Data were presented as mean  $\pm$  SD ( $n = 6$  independent samples for each group). The experiments were repeated, independently, 5 times with similar results observed.

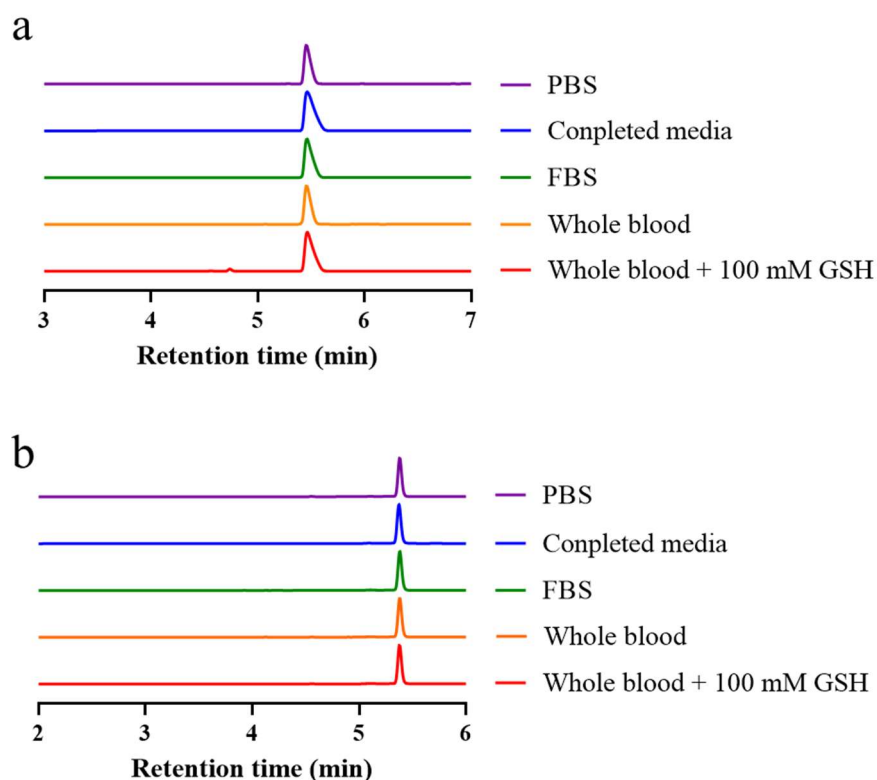

**Fig. S39.** Stability analysis of prodrugs (a) **11** and (b) **13** in PBS, complete media (containing 10 % fetal bovine serum in DMEM), fetal bovine serum (FBS), whole murine blood and whole

murine blood + 100 mM glutathione (GSH). Prodrugs (10 mM in DMSO) were diluted into the desired solutions to give a final concentration of 10  $\mu$ M and incubated at room temperature for 72 h. The prodrugs were extracted from aqueous solutions using DCM, dried and redissolved in 1:1 (v/v) MeCN/water followed by HPLC analysis (254 nm). The experiments were repeated, independently, 3 times with similar results observed.

### **Tumour model development**

To establish the HT-29 tumour model, HT-29 cells suspended in Matrigel were subcutaneously injected into the right flank subcutaneous tissues of the 6-8 week aged female BALB/c nude mice ( $1 \times 10^6$  cells/mouse). When the tumour size reached approximately 100 mm<sup>3</sup>, the mice were randomly divided into 6 groups (n = 5) for the treatment with PBS, pazopanib **10**, prodrug **11**, PBS + X-ray, pazopanib **10** + X-ray and prodrug **11** + X-ray (doses for both pazopanib **10** and prodrug **11**: 100 mg/kg, intratumoural injections). X-ray irradiation was conducted 4 h after injection (6 Gy, 6 Gy/min). Tumour sizes of each group were measured every other day using a calliper. Tumour volume = (length)  $\times$  (width)<sup>2</sup>/2. Relative tumour volume was calculated as  $V/V_0$  ( $V_0$  was the initial tumour volume). The body weights of the mice were measured every 2 days. The endpoint criteria of the study were a tumour size greater than 2,000 mm<sup>3</sup> and weight loss exceeding 15% of the starting weight. Tumours of mice in different treatment groups were sectioned for H&E staining and Ki67 immunostaining analysis.

Doxorubicin **15**, prodrug **13**, PBS + X-ray, doxorubicin **15** + X-ray and prodrug **13** + X-ray (doses for both **15** and **13**: 10 mg/kg, intratumoural injections) were analysed in a similar manner. X-ray irradiation was conducted 4 h after injection (6 Gy, 6 Gy/min). Tumour sizes and body weights of mice were analysed as conducted above.

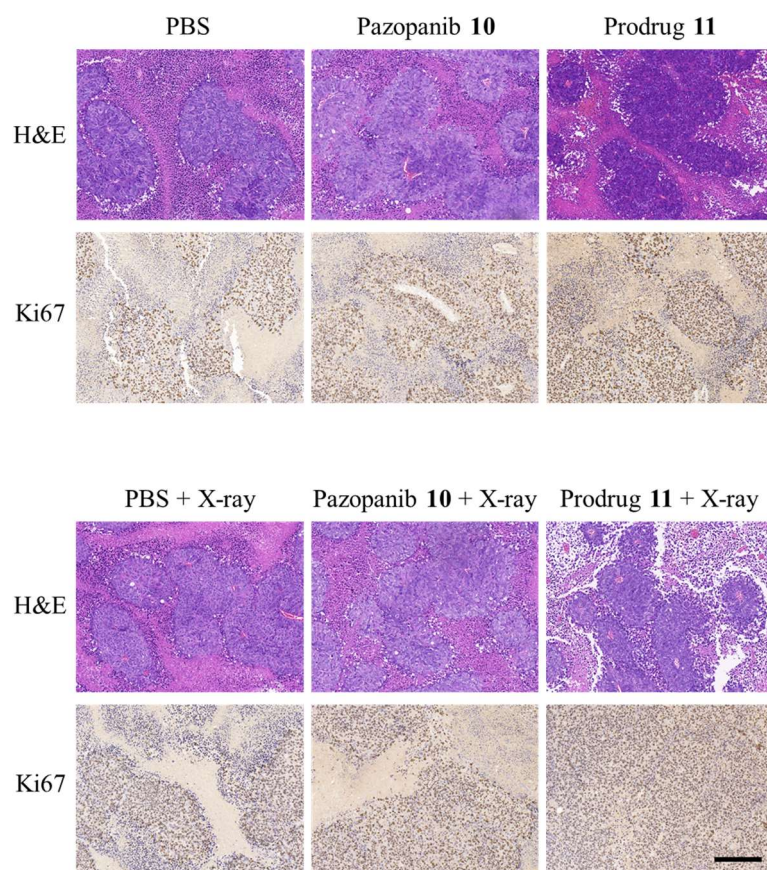

**Fig. S40.** Representative microscopic images of HT-29 tumour sections stained with H&E and Ki67 with Pazopanib and Prodrug **11**. Scale bar = 200  $\mu\text{m}$ . The experiments were repeated, independently, 5 times with similar results observed.

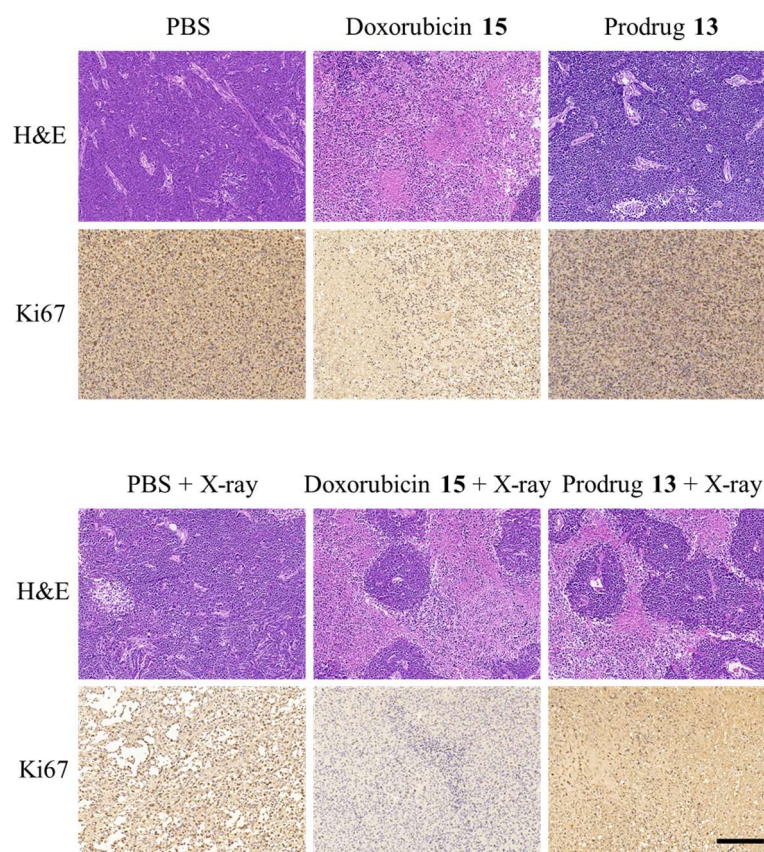

**Fig. S41.** Representative microscopic images of HeLa tumour sections stained with H&E and Ki67 with doxorubicin and prodrug **13**. Scale bar = 200  $\mu\text{m}$ . The experiments were repeated, independently, 5 times with similar results observed.

### Biosafety evaluations

Systemic toxicity was investigated by looking at the body weight changes, some biochemical markers in blood and histological changes to the main organs.

HeLa tumour (around 100  $\text{mm}^3$ ) bearing female BALB/c nude mice (6-8 week aged) were randomly divided into 5 groups ( $n = 5$ ) for the treatment with PBS, pazopanib **10**, prodrug **11**, doxorubicin **15** and prodrug **13** (pazopanib **10** and prodrug **11** dose: 100 mg/kg, doxorubicin **15** and prodrug **13** doses: 10 mg/kg, intratumoural injections). After 48 h, all mice were euthanized to collect blood and main organs for further tests. Blood samples were tested in terms of creatine kinase (CK), creatine kinase- muscle/brain (CK-MB), lactic acid

dehydrogenase (LDH), aspartate aminotransferase (AST), alanine aminotransferase (ALT), urea and alkaline phosphatase (ALP). Main organs were sectioned, stained with H&E and analysed immediately.

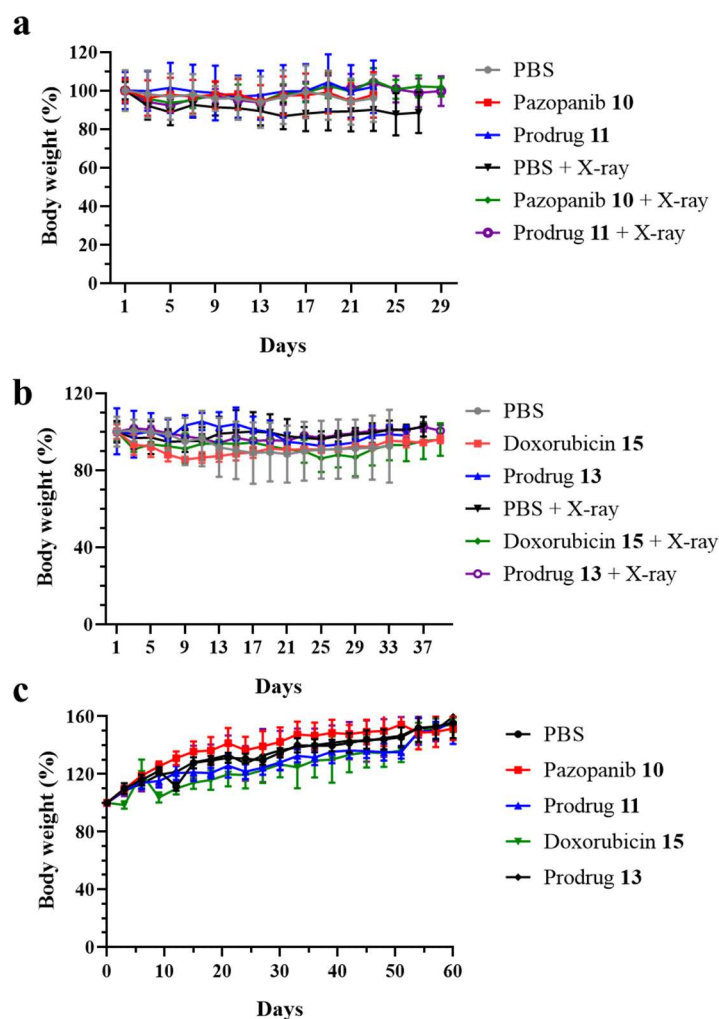

**Fig. S42.** Body weight changes in (a) HT-29 tumour bearing BALB/c nude mice treated with PBS, pazopanib 10 or prodrug 11 followed with or without 6 Gy X-ray irradiation. (b) HeLa tumour bearing BALB/c nude mice treated with PBS, doxorubicin 15 or prodrug 13 followed with or without 6 Gy X-ray irradiation. (c) Healthy BALB/c mice treated with PBS, pazopanib 10, prodrug 11, doxorubicin 15 and prodrug 13. Data were presented as mean  $\pm$  SD (n = 5 independent samples for each group).

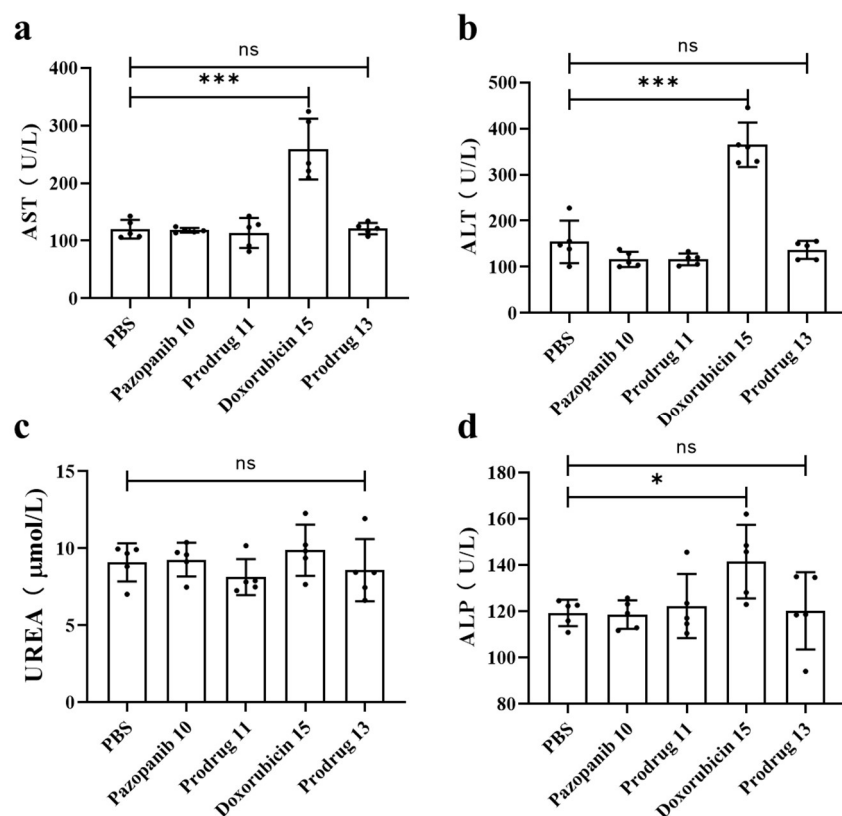

**Fig. S43.** Biochemical markers (a) AST, (b) ALT, (c) UREA and (d) ALP levels in plasma 48 h after treatments. Data were presented as mean  $\pm$  SD (n = 5 independent samples for each group). Statistical analysis was performed using one-way ANOVA with Dunnett post-test compared to PBS treated mice, \* P = 0.045, \*\*\* P < 0.001, ns (not significant).

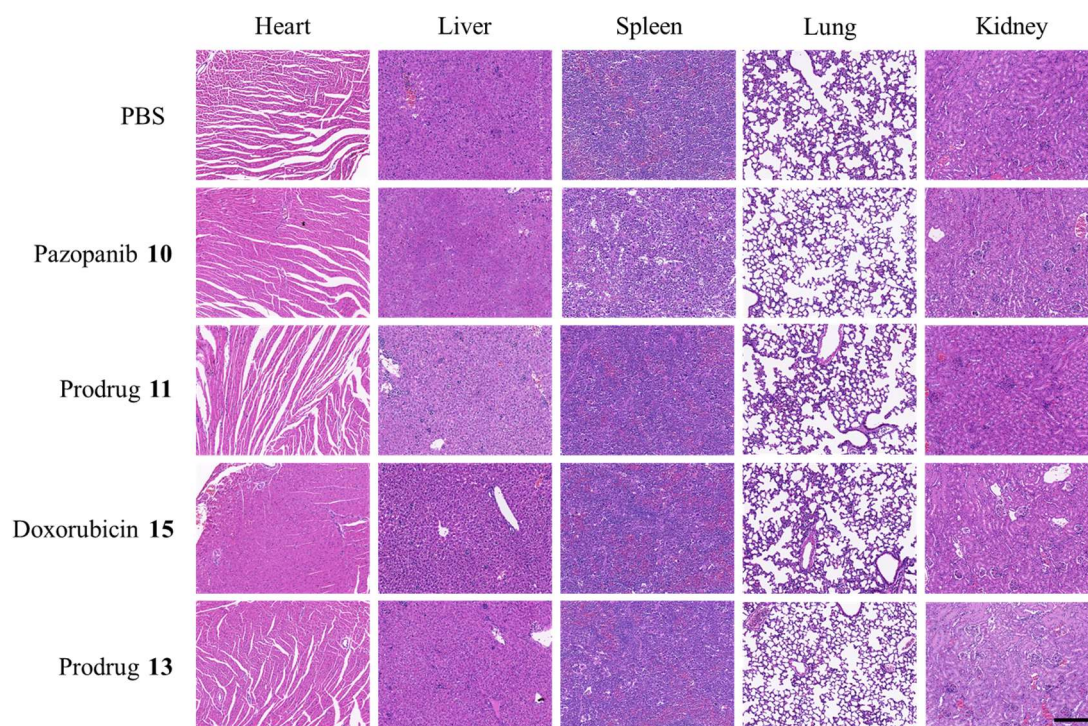

**Fig. S44.** Representative histopathological sections of organs collected from BALB/c mice 48 h after treatment. Free doxorubicin treated group experienced obvious pathological changes with atrophy and irregular arrangement of myocardial cells. The experiments were repeated, independently, 3 times with similar results observed.

#### References:

1. Barreto, J. C.; Smith, G. S.; Strobel, N. H. P.; McQuillin, P. A.; Miller, T. A., Terephthalic acid: A dosimeter for the detection of hydroxyl radicals in vitro. *Life Sci.* **1994**, *56*, PL89-PL96.
2. Flory, W. C.; Mehrens, S. M.; Blanchard, G. J., Structural Contributions to Second-Order Optical Nonlinearities in Oriented Interfacial Multilayers. *J. Am. Chem. Soc.* **2000**, *122*, 7976-7985.
3. Matikonda, S. S.; Fairhall, J. M.; Fiedler, F.; Sanhajariya, S.; Tucker, R. A. J.; Hook, S.; Garden, A. L.; Gamble, A. B., Mechanistic Evaluation of Bioorthogonal Decaging with trans-Cyclooctene: The Effect of Fluorine Substituents on Aryl Azide Reactivity and Decaging from the 1,2,3-Triazoline. *Bioconjug. Chem.* **2018**, *29*, 324-334.
